# Supplementary material for: New stable QTLs for berry weight do not colocalize with QTLs for seed traits in cultivated grapevine (Vitis vinifera L.)
Source: PubMed Central journal article supplement (PMC3878267; doi:10.1186/1471-2229-13-217), 2013-12-19

**Additional file 3: Figure S1** - Raw phenotypic data distributions for five seed and berry-related traits in four grapevine mapping populations. A. MBW: mean berry weight (g), B. MSN: mean seed number, C. TSWF: total seed fresh weight (mg), D. MSFW: mean seed fresh weight (mg), E. %SDM: seed dry matter percentage. Mean parental values: triangle for MTP2223-27 and Syrah; cross for MTP2121-30 and Grenache. Parental values were not available for MTP3140 in 1994 and 1996, MTP3234 and MTP3346.

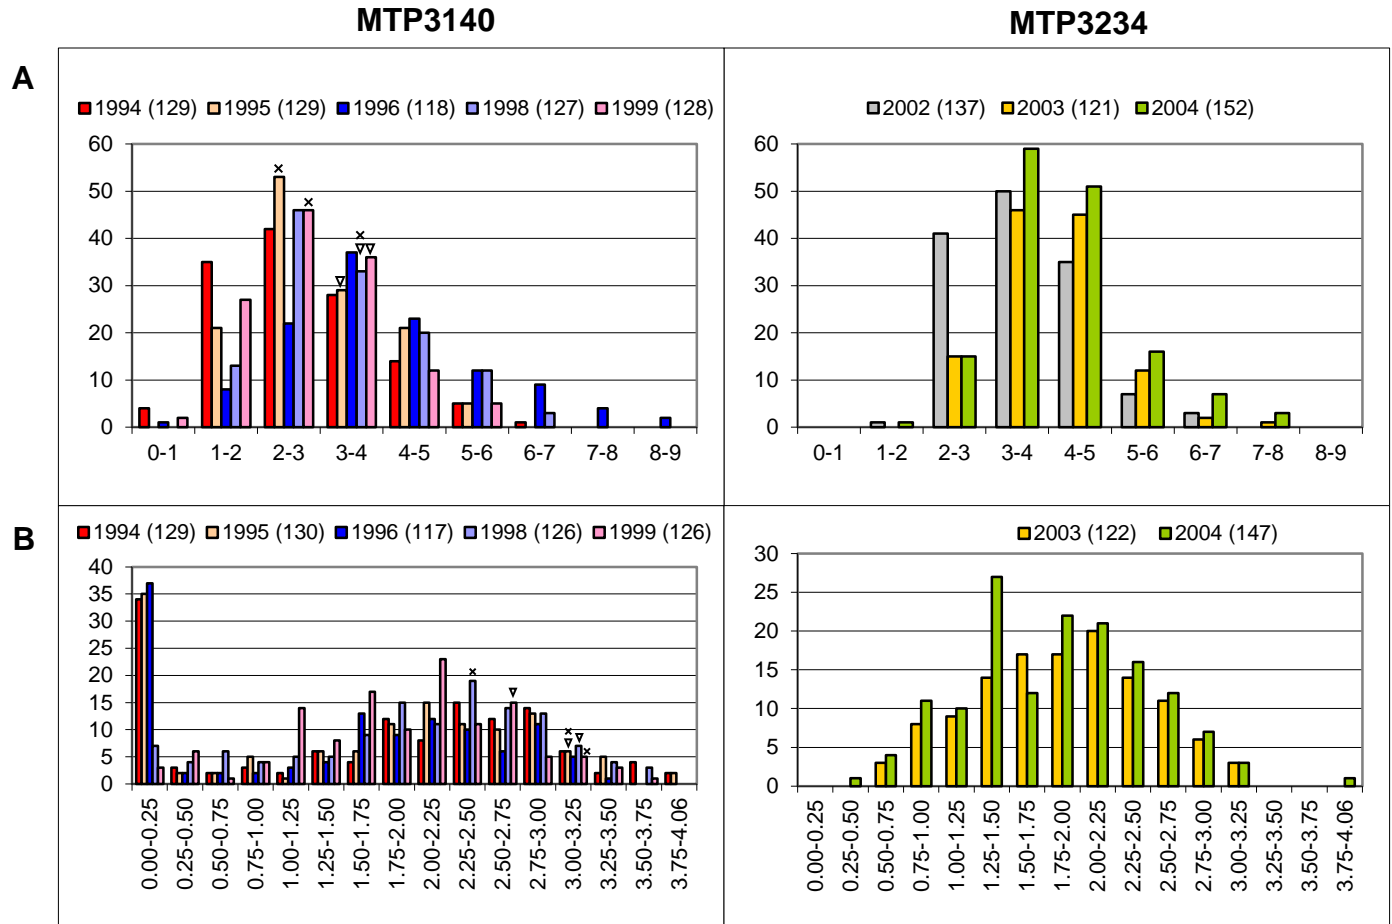

### SxG

### MTP3346

**A**

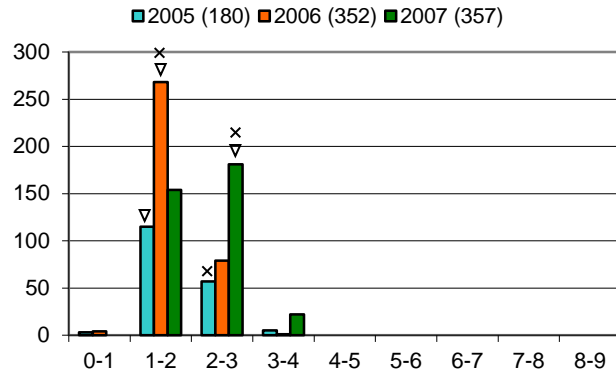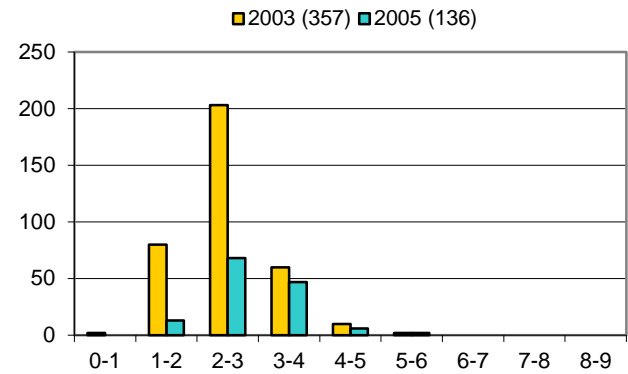

**B**

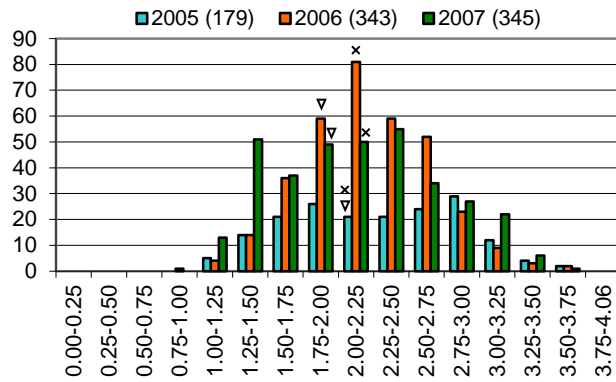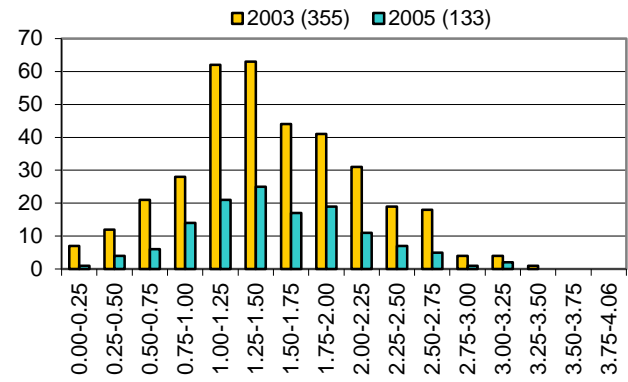

### MTP3140

C

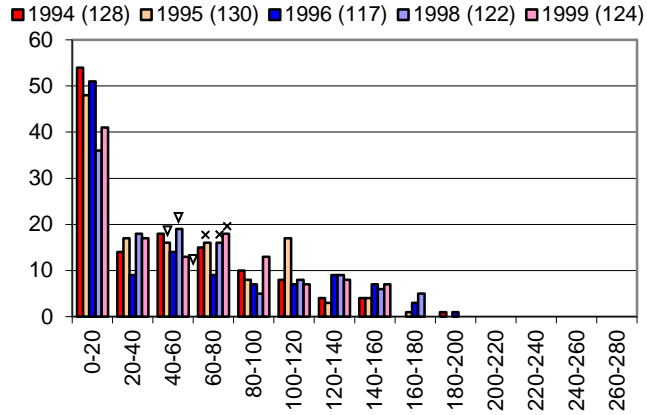

### MTP3234

C

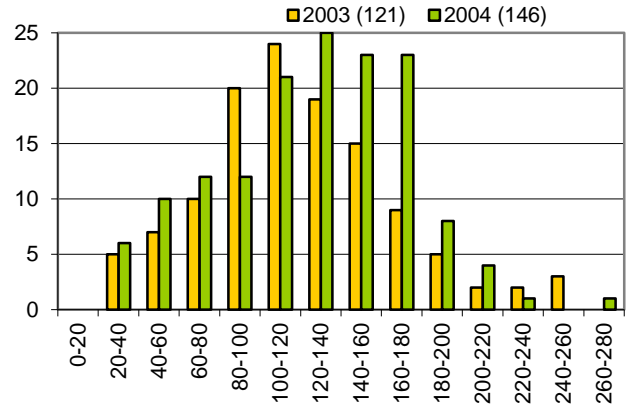

D

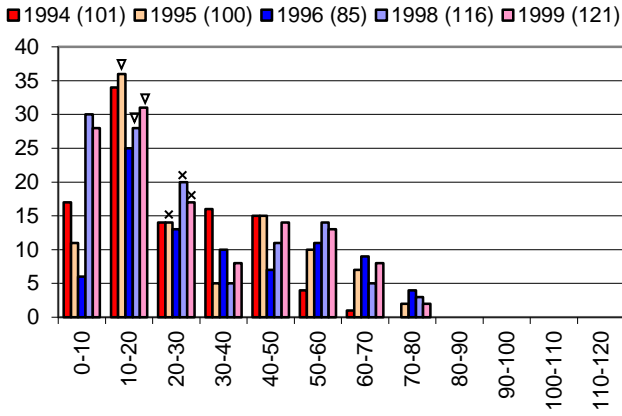

D

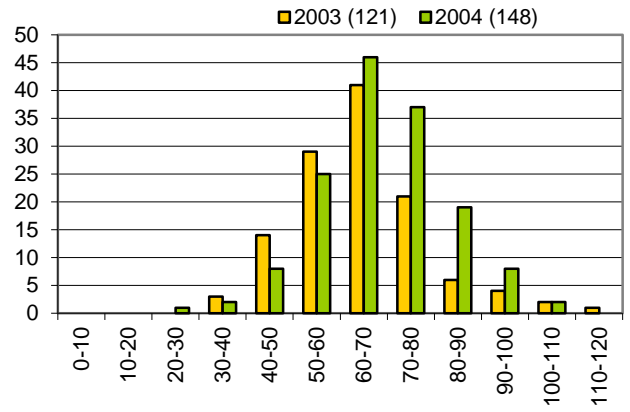

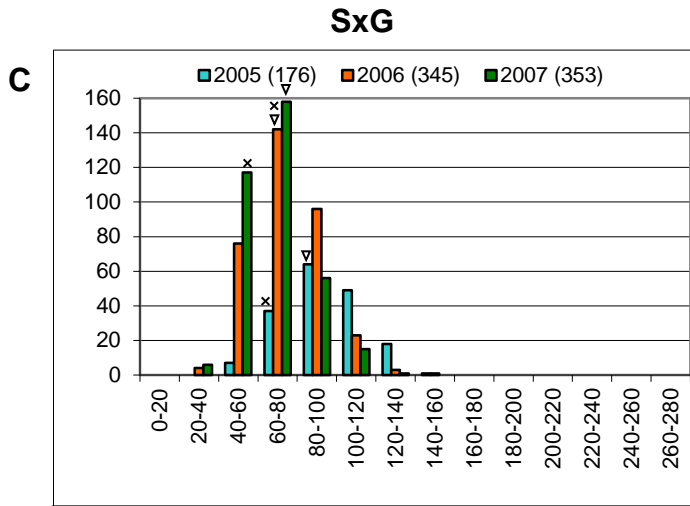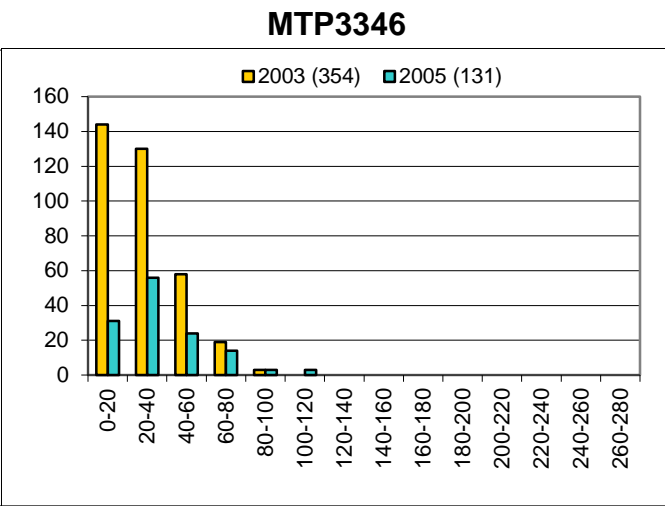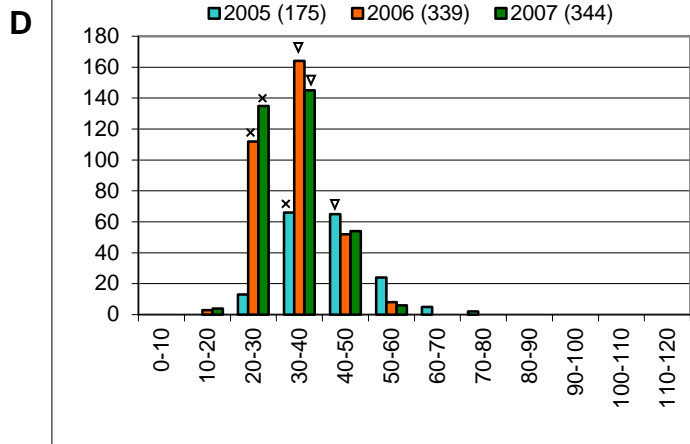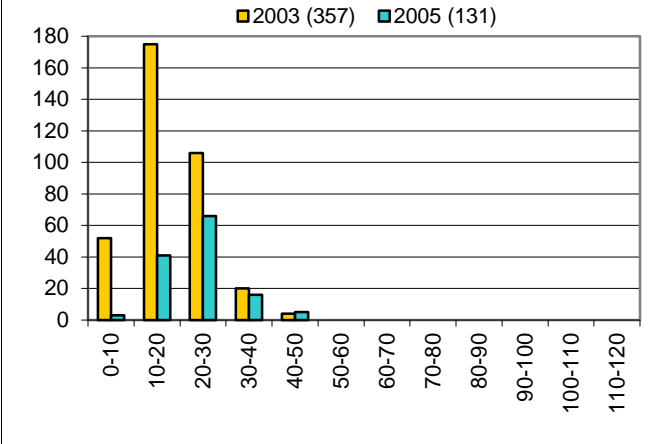

**E****MTP3140**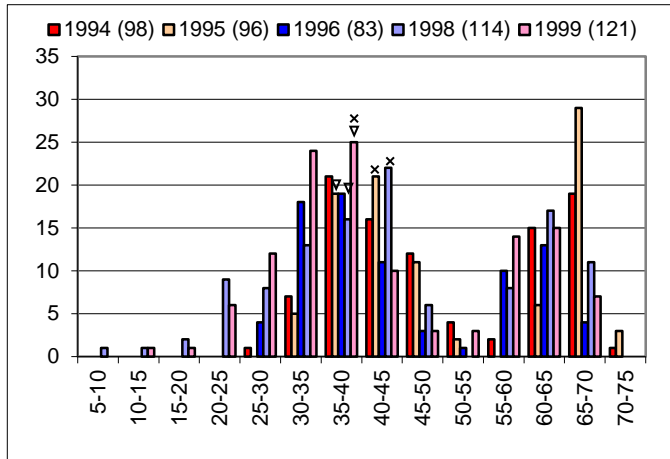**MTP3234**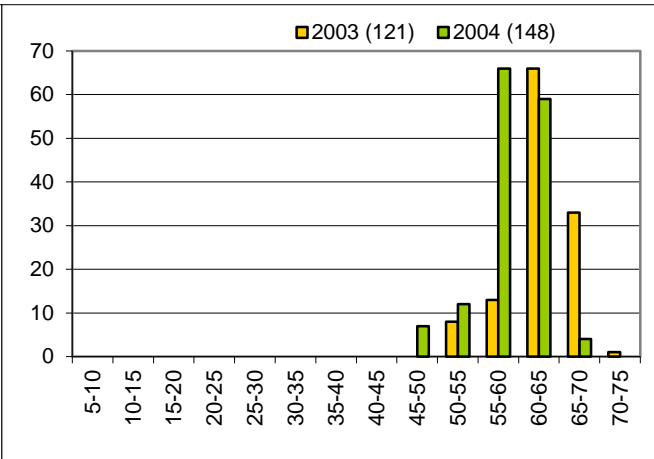**MTP3346****E**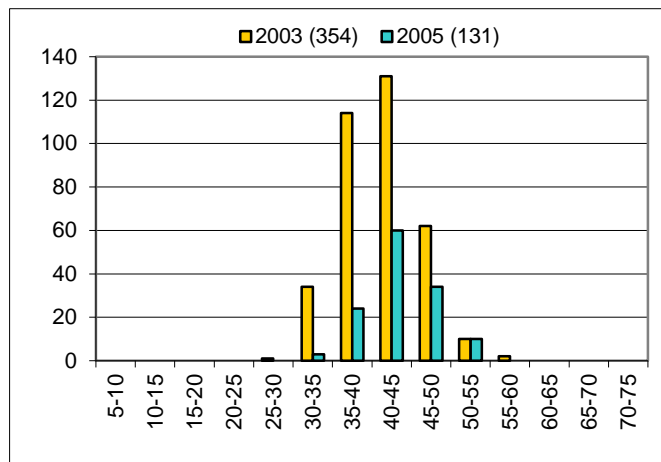

Supplement: 1471-2229-13-217-S3.pdf [file 1471-2229-13-217-S3.pdf]
