# Supplementary material for: New stable QTLs for berry weight do not colocalize with QTLs for seed traits in cultivated grapevine (Vitis vinifera L.)
Source: PubMed Central journal article supplement (PMC3878267; doi:10.1186/1471-2229-13-217), 2013-12-19
Supplement: 1471-2229-13-217-S1.pdf [file 1471-2229-13-217-S1.pdf]

**Additional file 1: Table S1 - Published QTLs for berry weight and seed traits in *Vitis***

| Trait | LG     | Doligez et al., 2002  | Fischer et al., 2004 <sup>1</sup> | Cabezas et al., 2006 | Mejia et al., 2007 | Costantini et al., 2008 <sup>2</sup> |
|-------|--------|-----------------------|-----------------------------------|----------------------|--------------------|--------------------------------------|
| MBW   | 1      |                       |                                   |                      |                    | 18                                   |
|       | 5      |                       | ? <sup>4</sup>                    |                      |                    |                                      |
|       | 12     |                       |                                   |                      |                    | 9                                    |
|       | 13     |                       | ? <sup>4</sup>                    |                      |                    |                                      |
|       | 15     |                       |                                   | 19                   |                    |                                      |
|       | 18-7F2 | <b>38<sup>2</sup></b> |                                   | <b>44</b>            | <b>67</b>          | <b>43</b>                            |
|       | 18-N83 |                       |                                   | 23                   |                    |                                      |
| MSN   | 2      |                       | nr                                |                      |                    | <b>23</b>                            |
|       | 8      | 11                    |                                   |                      |                    |                                      |
|       | 11     |                       |                                   | 67                   |                    |                                      |
|       | 18-7F2 | <b>48<sup>3</sup></b> |                                   |                      | <b>48</b>          |                                      |
| TSFW  | 1      |                       | nr                                | <b>15</b>            |                    | nr                                   |
|       | 10     |                       |                                   | <b>33</b>            |                    |                                      |
|       | 18-7F2 | <b>49<sup>3</sup></b> |                                   | <b>63</b>            | <b>84</b>          |                                      |
| MSFW  | 6      |                       | nr                                | nr                   | nr                 | 21                                   |
|       | 10     |                       |                                   |                      |                    | 13                                   |
|       | 13     |                       |                                   |                      |                    | <b>16<sup>5</sup></b>                |
|       | 15     |                       |                                   |                      |                    | 13                                   |
|       | 18-7F2 | <b>38<sup>3</sup></b> |                                   |                      |                    | <b>28</b>                            |
| %SDM  | 18-7F2 | <b>40<sup>3</sup></b> | nr                                |                      | 64                 | <b>91</b>                            |

QTLs detected with a genome-wide first-type error rate of 5%. The reported number is the maximum % of total variance explained among years and maps (parental and consensus), in bold when the QTL was present in at least 2 years. nr: trait not reported.

The results of Fanizza et al. (2005) were not included because they were based on a subset of the data reported in Costantini et al. (2008); those of Mejia et al. (2011) were not included because the QTLs on LGs others than LG 18 were not reported.

MBW: mean berry weight; MSN: mean seed number; TSFW: total seed fresh weight; MSFW: mean seed fresh weight; %SDM: seed dry matter percentage; RESN: residual berry weight unexplained by seed number; RESFW: residual berry weight unexplained by total seed fresh weight

<sup>1</sup> Complex hybrid cross including up to seven American *Vitis* species

<sup>2</sup> LOD threshold was extrapolated from the available chromosome-wide values to 3.5 for parental maps and 4.5 for consensus map, to reflect usual values of genome-wide values

<sup>3</sup> LG determined according to Doligez et al., 2010

<sup>4</sup> Stable QTL detected but magnitude of effect not reported

<sup>5</sup> Doubtful QTL (in a large gap of 26.4 cM, with no strong significance of KW test)
