# Supplementary material for: New stable QTLs for berry weight do not colocalize with QTLs for seed traits in cultivated grapevine (Vitis vinifera L.)
Source: PubMed Central journal article supplement (PMC3878267; doi:10.1186/1471-2229-13-217), 2013-12-19
Supplement: 1471-2229-13-217-S2.pdf [file 1471-2229-13-217-S2.pdf]

**Additional file 2: Table S2 - Main features of the framework genetic maps used for QTL detection in four grapevine mapping populations.**

| Progeny                         | MTP3140 |      |      | MTP3234 |      |      | SxG |      |      | MTP3346 <sup>1</sup> |      |      |
|---------------------------------|---------|------|------|---------|------|------|-----|------|------|----------------------|------|------|
| Map                             | F       | C    | M    | F       | C    | M    | S   | C    | G    | F                    | C    | M    |
| Total # of loci                 | 187     | 233  | 199  | 96      | 119  | 105  | 121 | 153  | 133  | 25                   | 29   | 26   |
| Total length (cM)               | 1079    | 1204 | 1143 | 935     | 1267 | 1365 | 986 | 1116 | 1170 | 260                  | 290  | 235  |
| Mean inter-marker distance (cM) | 6.4     | 5.6  | 6.4  | 12.1    | 12.7 | 15.9 | 9.7 | 8.3  | 10.3 | 17.3                 | 15.3 | 14.7 |
| # gaps > 20 cM                  | 3       | 5    | 5    | 12      | 17   | 25   | 6   | 10   | 17   | 4                    | 5    | 4    |
| # gaps > 30 cM                  | 0       | 1    | 2    | 3       | 3    | 8    | 0   | 0    | 3    | 1                    | 0    | 0    |

<sup>1</sup>partial map in only ten genomic regions of 15.9-48.9 cM

Maps were already published for MTP3140 [87], MTP3234 [47] and MTP3346 [87]

F female, C consensus, M male, S Syrah, G Grenache, #: number of; cM: centiMorgan
