# Supplementary material for: New stable QTLs for berry weight do not colocalize with QTLs for seed traits in cultivated grapevine (Vitis vinifera L.)
Source: PubMed Central journal article supplement (PMC3878267; doi:10.1186/1471-2229-13-217), 2013-12-19
Supplement: 1471-2229-13-217-S4.pdf [file 1471-2229-13-217-S4.pdf]

**Additional file 4: Table S3** - Transformations applied to raw data and model selected to estimate BLUPs of genetic values and broad-sense heritability, for seven seed and berry-related traits in four grapevine mapping populations.

| Trait | MTP3140  |       | MTP3234  |                | SxG      |                    | MTP3346  |       |
|-------|----------|-------|----------|----------------|----------|--------------------|----------|-------|
|       | Transfo. | Model | Transfo. | Model          | Transfo. | Model <sup>1</sup> | Transfo. | Model |
| MBW   | sqrt     | G + Y | ln       | G + Y          | sqrt     | G + Y              | sqrt     | G + Y |
| MSN   | -        | G + Y | -        | G              | sqrt     | G + Y              | none     | G     |
| TSFW  | sqrt     | G + Y | -        | G <sup>2</sup> | sqrt     | G + Y              | sqrt     | G + Y |
| MSFW  | sqrt     | G + Y | sqrt     | G + Y          | sqrt     | G + Y              | sqrt     | G + Y |
| %SDM  | ln       | G + Y | none     | G + Y          | sqrt     | -                  | sqrt     | G + Y |
| RESN  | sqrt(+3) | G     | sqrt(+2) | G              | sqrt(+2) | G                  | sqrt(+2) | G     |
| RESFW | -        | G     | sqrt(+2) | G              | sqrt(+2) | G                  | sqrt(+2) | G     |

<sup>1</sup> block effect was tested but never retained in model selection

<sup>2</sup> model without year was selected even if BIC was larger than for the model with year, because year effect was not significant

Transfo.: transformation of raw data; sqrt: square root; ln: neperian logarithm; -: not transformed

G: random genotype effect, Y: fixed year effect

MBW: mean berry weight; MSN: mean seed number; TSFW: total seed fresh weight; MSFW: mean seed fresh weight; %SDM: seed dry matter percentage; RESN: residual berry weight unexplained by seed number; RESFW: residual berry weight unexplained by total seed fresh weight
