# Supplementary material for: New stable QTLs for berry weight do not colocalize with QTLs for seed traits in cultivated grapevine (Vitis vinifera L.)
Source: PubMed Central journal article supplement (PMC3878267; doi:10.1186/1471-2229-13-217), 2013-12-19
Supplement: 1471-2229-13-217-S5.pdf [file 1471-2229-13-217-S5.pdf]

**Additional file 5: Table S4** - Phenotypic correlations between years for seven seed and berry-related traits in four grapevine mapping populations (Spearman correlation coefficient).

|         |           | MBW  | MSN  | TSFW | MSFW | %SDM | RESN | RESFW |
|---------|-----------|------|------|------|------|------|------|-------|
| MTP3140 | 1994-1995 | 0.84 | 0.84 | 0.97 | 0.91 | 0.89 | 0.75 | 0.67  |
|         | 1994-1996 | 0.83 | 0.84 | 0.95 | 0.86 | 0.81 | 0.73 | 0.62  |
|         | 1994-1998 | 0.84 | 0.70 | 0.94 | 0.90 | 0.86 | 0.70 | 0.65  |
|         | 1994-1999 | 0.86 | 0.64 | 0.94 | 0.88 | 0.85 | 0.69 | 0.71  |
|         | 1995-1996 | 0.81 | 0.82 | 0.95 | 0.92 | 0.82 | 0.77 | 0.61  |
|         | 1995-1998 | 0.85 | 0.77 | 0.94 | 0.94 | 0.86 | 0.79 | 0.63  |
|         | 1995-1999 | 0.82 | 0.69 | 0.94 | 0.93 | 0.86 | 0.74 | 0.57  |
|         | 1996-1998 | 0.84 | 0.71 | 0.94 | 0.93 | 0.83 | 0.74 | 0.72  |
|         | 1996-1999 | 0.83 | 0.60 | 0.94 | 0.90 | 0.79 | 0.67 | 0.63  |
|         | 1998-1999 | 0.88 | 0.63 | 0.95 | 0.95 | 0.88 | 0.85 | 0.73  |
| MTP3234 | 2002-2003 | 0.64 | -    | -    | -    | -    | -    | -     |
|         | 2002-2004 | 0.73 | -    | -    | -    | -    | -    | -     |
|         | 2003-2004 | 0.80 | 0.52 | 0.60 | 0.70 | 0.41 | 0.74 | 0.64  |
| SxG     | 2005-2006 | 0.74 | 0.62 | 0.46 | 0.57 | -    | 0.76 | 0.75  |
|         | 2005-2007 | 0.76 | 0.76 | 0.58 | 0.68 | -    | 0.75 | 0.71  |
|         | 2006-2007 | 0.69 | 0.62 | 0.48 | 0.59 | -    | 0.70 | 0.70  |
| MTP3346 | 2003-2005 | 0.40 | 0.47 | 0.56 | 0.53 | 0.50 | 0.41 | 0.38  |

All correlations were always highly significant ( $P < 0.001$ ).

MBW: mean berry weight; MSN: mean seed number; TSFW: total seed fresh weight; MSFW: mean seed fresh weight; %SDM: seed dry matter percentage; RESN: residual berry weight unexplained by seed number; RESFW: residual berry weight unexplained by total seed fresh weight
