# Supplementary material for: New stable QTLs for berry weight do not colocalize with QTLs for seed traits in cultivated grapevine (Vitis vinifera L.)
Source: PubMed Central journal article supplement (PMC3878267; doi:10.1186/1471-2229-13-217), 2013-12-19
Supplement: 1471-2229-13-217-S6.pdf [file 1471-2229-13-217-S6.pdf]

**Additional file 6: Figure S2** - Genetic correlations (among BLUPs of the genetic value) between seven seed and berry-related traits within years in the grapevine mapping population MTP3346. Background cell color indicates Spearman test significance: alpha=5% (light yellow), 1% (dark yellow), 0.1% (orange), not significant (white). MBW: mean berry weight; MSN: mean seed number; TSFW: total seed fresh weight; MSFW: mean seed fresh weight; %SDM: seed dry matter percentage; RESN: residual berry weight unexplained by seed number; RESFW: residual berry weight unexplained by total seed fresh weight.

|      | MSN  | TSFW | MSFW | %SDM | RESN  | RESFW |
|------|------|------|------|------|-------|-------|
| MBW  | 0.38 | 0.29 | 0.09 | 0.02 | 0.90  | 0.94  |
| MSN  |      | 0.80 | 0.32 | 0.21 | 0.00  | 0.15  |
| TSFW |      |      | 0.80 | 0.37 | -0.02 | -0.01 |
| MSFW |      |      |      | 0.36 | -0.02 | -0.16 |
| %SDM |      |      |      |      | -0.09 | -0.10 |
| RESN |      |      |      |      |       | 0.96  |

 \*\*\*  $P < 0.001$   
 \*\*  $P < 0.01$   
 \*  $P < 0.05$
