# Supplementary material for: New stable QTLs for berry weight do not colocalize with QTLs for seed traits in cultivated grapevine (Vitis vinifera L.)
Source: PubMed Central journal article supplement (PMC3878267; doi:10.1186/1471-2229-13-217), 2013-12-19
Supplement: 1471-2229-13-217-S7.pdf [file 1471-2229-13-217-S7.pdf]

**Additional file 7: Table S5** - Broad sense heritability of seven seed and berry-related traits in the grapevine mapping population MTP3346.

|         | MBW  | MSN  | TSFW | MSFW | %SDM | RESN | RESFW |
|---------|------|------|------|------|------|------|-------|
| MTP3346 | 0.51 | 0.59 | 0.64 | 0.64 | 0.62 | 0.52 | 0.52  |

MBW: mean berry weight; MSN: mean seed number; TSFW: total seed fresh weight; MSFW: mean seed fresh weight; %SDM: seed dry matter percentage; RESN: residual berry weight unexplained by seed number; RESFW: residual berry weight unexplained by total seed fresh weight
