# Supplementary material for: New stable QTLs for berry weight do not colocalize with QTLs for seed traits in cultivated grapevine (Vitis vinifera L.)
Source: PubMed Central journal article supplement (PMC3878267; doi:10.1186/1471-2229-13-217), 2013-12-19
Supplement: 1471-2229-13-217-S10.pdf [file 1471-2229-13-217-S10.pdf]

**Additional file 10: Table S8** - Detailed features of all QTLs for seven seed and berry-related traits in four grapevine mapping populations (consensus maps), derived with the MQM method.

| Trait        | LG        | Population     | Year <sup>1</sup> | QTL position (cM) |                  | QTL effect  |               |           |                         |
|--------------|-----------|----------------|-------------------|-------------------|------------------|-------------|---------------|-----------|-------------------------|
|              |           |                |                   | LOD peak          | CI               | LOD         | LOD threshold | %var      | Largest allelic effects |
| MBW          | 1         | MTP3140        | B                 | 37.4              | 32.7-43.4        | 5.3         | 4.8           | 5         | Af,D                    |
| MBW          | 4         | SxG            | 2005              | 53.7              | 47.7-56          | 5.1         | 4.6           | 7         | Af,D                    |
| MBW          | 5         | MTP3234        | 2002              | 24.0              | 13-32            | 5.5         | 4.7           | 22        | Am,D                    |
| <b>MBW</b>   | <b>8</b>  | <b>SxG</b>     | <b>B</b>          | <b>32.7</b>       | <b>24.7-56.3</b> | <b>7.0</b>  | <b>4.6</b>    | <b>10</b> | <b>Af</b>               |
| <b>MBW</b>   | <b>8</b>  | <b>SxG</b>     | <b>B</b>          | <b>46.4</b>       | <b>22.7-56.3</b> | <b>6.7</b>  | <b>4.6</b>    | <b>9</b>  | <b>Af</b>               |
| <b>MBW</b>   | <b>8</b>  | <b>SxG</b>     | <b>2005</b>       | <b>30.7</b>       | <b>21.2-48.4</b> | <b>5.6</b>  | <b>4.6</b>    | <b>9</b>  | <b>Af,D</b>             |
| <b>MBW</b>   | <b>8</b>  | <b>SxG</b>     | <b>2005</b>       | <b>42.4</b>       | <b>21.2-56.3</b> | <b>4.9</b>  | <b>4.6</b>    | <b>7</b>  | <b>Af</b>               |
| <b>MBW</b>   | <b>8</b>  | <b>SxG</b>     | <b>2006</b>       | <b>32.7</b>       | <b>24.7-44.4</b> | <b>8.5</b>  | <b>4.5</b>    | <b>16</b> | <b>Af</b>               |
| <b>MBW</b>   | <b>11</b> | <b>MTP3140</b> | <b>B</b>          | <b>14.9</b>       | <b>9.6-24.9</b>  | <b>6.6</b>  | <b>4.8</b>    | <b>6</b>  | <b>Af,Am</b>            |
| <b>MBW</b>   | <b>11</b> | <b>MTP3140</b> | <b>1995</b>       | <b>3.6</b>        | <b>0-10.1</b>    | <b>6.1</b>  | <b>4.6</b>    | <b>11</b> | <b>Am</b>               |
| <b>MBW</b>   | <b>11</b> | <b>MTP3140</b> | <b>1998</b>       | <b>16.9</b>       | <b>9.6-25.7</b>  | <b>6.1</b>  | <b>4.9</b>    | <b>10</b> | <b>Af,Am</b>            |
| MBW          | 13        | SxG            | B                 | 23.6              | 19.1-30.8        | 6.0         | 4.6           | 8         | Af                      |
| MBW          | 13        | SxG            | 2005              | 26.8              | 19.6-32.2        | 6.5         | 4.6           | 10        | Af,D                    |
| MBW          | 14        | MTP3140        | 1999              | 30.0              | 21.9-33.7        | 4.9         | 4.7           | 7         | Am                      |
| <b>MBW</b>   | <b>17</b> | <b>MTP3140</b> | <b>B</b>          | <b>22.9</b>       | <b>21.2-28.3</b> | <b>10.3</b> | <b>4.8</b>    | <b>10</b> | <b>Am,D</b>             |
| <b>MBW</b>   | <b>17</b> | <b>MTP3140</b> | <b>1995</b>       | <b>22.9</b>       | <b>21.2-28.3</b> | <b>8.6</b>  | <b>4.6</b>    | <b>13</b> | <b>Am,D</b>             |
| <b>MBW</b>   | <b>17</b> | <b>MTP3140</b> | <b>1998</b>       | <b>21.2</b>       | <b>18-26.3</b>   | <b>7.2</b>  | <b>4.9</b>    | <b>11</b> | <b>Am,D</b>             |
| <b>MBW</b>   | <b>17</b> | <b>MTP3140</b> | <b>1999</b>       | <b>22.9</b>       | <b>21.2-28.3</b> | <b>4.9</b>  | <b>4.7</b>    | <b>7</b>  | <b>Am</b>               |
| <b>MBW</b>   | <b>17</b> | <b>SxG</b>     | <b>B</b>          | <b>16.1</b>       | <b>11.3-20.1</b> | <b>17.1</b> | <b>4.6</b>    | <b>23</b> | <b>Am</b>               |
| <b>MBW</b>   | <b>17</b> | <b>SxG</b>     | <b>2005</b>       | <b>13.3</b>       | <b>9.3-18.1</b>  | <b>15.5</b> | <b>4.6</b>    | <b>24</b> | <b>Am</b>               |
| <b>MBW</b>   | <b>17</b> | <b>SxG</b>     | <b>2006</b>       | <b>14.1</b>       | <b>9.3-20.4</b>  | <b>9.7</b>  | <b>4.5</b>    | <b>15</b> | <b>Am</b>               |
| <b>MBW</b>   | <b>17</b> | <b>SxG</b>     | <b>2007</b>       | <b>13.3</b>       | <b>9.3-20.4</b>  | <b>15.4</b> | <b>4.6</b>    | <b>29</b> | <b>Am</b>               |
| <b>MBW</b>   | <b>17</b> | <b>SxG</b>     | <b>2007</b>       | <b>16.1</b>       | <b>11.3-20.4</b> | <b>16.2</b> | <b>4.6</b>    | <b>31</b> | <b>Am</b>               |
| <b>MBW</b>   | <b>18</b> | <b>MTP3140</b> | <b>B</b>          | <b>93.0</b>       | <b>87.6-93.3</b> | <b>38.6</b> | <b>4.8</b>    | <b>61</b> | <b>Af,Am</b>            |
| <b>MBW</b>   | <b>18</b> | <b>MTP3140</b> | <b>1994</b>       | <b>91.0</b>       | <b>87.6-93.3</b> | <b>26.1</b> | <b>4.9</b>    | <b>61</b> | <b>Af,Am</b>            |
| <b>MBW</b>   | <b>18</b> | <b>MTP3140</b> | <b>1995</b>       | <b>93.0</b>       | <b>91-93.3</b>   | <b>27.4</b> | <b>4.6</b>    | <b>58</b> | <b>Af,Am</b>            |
| <b>MBW</b>   | <b>18</b> | <b>MTP3140</b> | <b>1996</b>       | <b>91.0</b>       | <b>87.6-93.3</b> | <b>17.1</b> | <b>4.7</b>    | <b>49</b> | <b>Af,Am</b>            |
| <b>MBW</b>   | <b>18</b> | <b>MTP3140</b> | <b>1998</b>       | <b>93.0</b>       | <b>87.6-93.3</b> | <b>22.2</b> | <b>4.9</b>    | <b>45</b> | <b>Af,Am</b>            |
| <b>MBW</b>   | <b>18</b> | <b>MTP3140</b> | <b>1999</b>       | <b>89.6</b>       | <b>87.6-93</b>   | <b>28.3</b> | <b>4.7</b>    | <b>58</b> | <b>Af,Am</b>            |
| <b>MBW</b>   | <b>18</b> | <b>SxG</b>     | <b>B</b>          | <b>36.9</b>       | <b>34-42.9</b>   | <b>6.6</b>  | <b>4.6</b>    | <b>8</b>  | <b>Am</b>               |
| <b>MBW</b>   | <b>18</b> | <b>SxG</b>     | <b>2006</b>       | <b>34.9</b>       | <b>32.6-42.9</b> | <b>5.9</b>  | <b>4.5</b>    | <b>9</b>  | <b>Am</b>               |
| <b>MBW</b>   | <b>18</b> | <b>SxG</b>     | <b>2007</b>       | <b>36.9</b>       | <b>34-43.3</b>   | <b>5.0</b>  | <b>4.6</b>    | <b>9</b>  | <b>Am,D</b>             |
|              |           |                |                   |                   |                  |             |               |           |                         |
| RESFW        | 5         | MTP3346        | B                 | 0.0               | 0-7.3            | 4.0         | 3.8           | 5         | Af                      |
| <b>RESFW</b> | <b>8</b>  | <b>SxG</b>     | <b>B</b>          | <b>32.7</b>       | <b>21.2-56.3</b> | <b>8.1</b>  | <b>4.6</b>    | <b>10</b> | <b>Af</b>               |
| <b>RESFW</b> | <b>8</b>  | <b>SxG</b>     | <b>B</b>          | <b>46.4</b>       | <b>21.2-56.3</b> | <b>8.0</b>  | <b>4.6</b>    | <b>10</b> | <b>Af</b>               |
| <b>RESFW</b> | <b>8</b>  | <b>SxG</b>     | <b>2005</b>       | <b>30.7</b>       | <b>21.2-48.4</b> | <b>5.9</b>  | <b>4.6</b>    | <b>9</b>  | <b>Af</b>               |
| <b>RESFW</b> | <b>8</b>  | <b>SxG</b>     | <b>2005</b>       | <b>40.4</b>       | <b>21.2-54.4</b> | <b>5.3</b>  | <b>4.6</b>    | <b>8</b>  | <b>Af</b>               |
| <b>RESFW</b> | <b>8</b>  | <b>SxG</b>     | <b>2006</b>       | <b>34.7</b>       | <b>26.7-52.4</b> | <b>10.6</b> | <b>4.6</b>    | <b>16</b> | <b>Af</b>               |
| <b>RESFW</b> | <b>8</b>  | <b>SxG</b>     | <b>2006</b>       | <b>44.4</b>       | <b>28.7-52.4</b> | <b>10.7</b> | <b>4.6</b>    | <b>17</b> | <b>Af,Am</b>            |
| <b>RESFW</b> | <b>8</b>  | <b>SxG</b>     | <b>2007</b>       | <b>17.2</b>       | <b>9.2-34.7</b>  | <b>4.9</b>  | <b>4.5</b>    | <b>7</b>  | <b>Af</b>               |
| RESFW        | 11        | MTP3140        | 1995              | 3.6               | 0-9.6            | 6.3         | 4.7           | 26        | Am                      |
| <b>RESFW</b> | <b>13</b> | <b>SxG</b>     | <b>B</b>          | <b>6.0</b>        | <b>0-19.6</b>    | <b>8.5</b>  | <b>4.6</b>    | <b>10</b> | <b>Af,Am</b>            |
| <b>RESFW</b> | <b>13</b> | <b>SxG</b>     | <b>B</b>          | <b>11.1</b>       | <b>0-19.6</b>    | <b>8.9</b>  | <b>4.6</b>    | <b>11</b> | <b>Af,Am</b>            |
| <b>RESFW</b> | <b>13</b> | <b>SxG</b>     | <b>2005</b>       | <b>26.8</b>       | <b>19.6-32.2</b> | <b>9.7</b>  | <b>4.6</b>    | <b>18</b> | <b>Af</b>               |



|             |           |                |             |             |                  |             |            |           |                |
|-------------|-----------|----------------|-------------|-------------|------------------|-------------|------------|-----------|----------------|
| <b>MSN</b>  | <b>2</b>  | <b>SxG</b>     | <b>B</b>    | <b>12.0</b> | <b>6-18</b>      | <b>17.5</b> | <b>4.6</b> | <b>37</b> | <b>Am,D</b>    |
| <b>MSN</b>  | <b>2</b>  | <b>SxG</b>     | <b>2005</b> | <b>14.0</b> | <b>8-21.3</b>    | <b>11.1</b> | <b>4.6</b> | <b>30</b> | <b>Am,D</b>    |
| <b>MSN</b>  | <b>2</b>  | <b>SxG</b>     | <b>2006</b> | <b>12.0</b> | <b>2-23.3</b>    | <b>5.5</b>  | <b>4.7</b> | <b>12</b> | <b>Am,D</b>    |
| <b>MSN</b>  | <b>2</b>  | <b>SxG</b>     | <b>2007</b> | <b>12.0</b> | <b>6-18</b>      | <b>24.8</b> | <b>4.7</b> | <b>48</b> | <b>Af,Am,D</b> |
| <b>MSN</b>  | <b>4</b>  | <b>SxG</b>     | <b>B</b>    | <b>53.7</b> | <b>49.7-56</b>   | <b>13.9</b> | <b>4.6</b> | <b>24</b> | <b>Af</b>      |
| <b>MSN</b>  | <b>4</b>  | <b>SxG</b>     | <b>2005</b> | <b>56.0</b> | <b>49.7-56</b>   | <b>8.1</b>  | <b>4.6</b> | <b>15</b> | <b>Af</b>      |
| <b>MSN</b>  | <b>4</b>  | <b>SxG</b>     | <b>2006</b> | <b>56.0</b> | <b>51.7-56</b>   | <b>15.8</b> | <b>4.7</b> | <b>29</b> | <b>Af</b>      |
| <b>MSN</b>  | <b>4</b>  | <b>SxG</b>     | <b>2007</b> | <b>53.7</b> | <b>47.7-56</b>   | <b>9.0</b>  | <b>4.7</b> | <b>14</b> | <b>Af</b>      |
| MSN         | 8         | MTP3346        | B           | 16.5        | 6-16.5           | 3.7         | 3.7        | 4         | Am,D           |
| MSN         | 14        | MTP3234        | B           | 28.0        | 19-34            | 7.4         | 4.5        | 25        | Af,Am          |
| MSN         | 14        | MTP3234        | B           | 22.0        | 19-36            | 6.6         | 4.5        | 19        | Af,Am          |
| MSN         | 14        | MTP3234        | 2004        | 30.0        | 24-36            | 8.2         | 4.6        | 28        | Af,Am          |
| MSN         | 14        | MTP3234        | 2004        | 22.0        | 19-37            | 6.4         | 4.6        | 19        | Af,Am          |
| <b>MSN</b>  | <b>14</b> | <b>MTP3346</b> | <b>B</b>    | <b>29.9</b> | <b>23.9-35.9</b> | <b>12.4</b> | <b>3.7</b> | <b>19</b> | <b>Am,D</b>    |
| <b>MSN</b>  | <b>14</b> | <b>MTP3346</b> | <b>2003</b> | <b>29.9</b> | <b>23.9-35.9</b> | <b>9.9</b>  | <b>4.0</b> | <b>17</b> | <b>Am,D</b>    |
| <b>MSN</b>  | <b>14</b> | <b>MTP3346</b> | <b>2005</b> | <b>27.9</b> | <b>19.9-36.4</b> | <b>5.2</b>  | <b>3.9</b> | <b>23</b> | <b>Af,D</b>    |
| <b>MSN</b>  | <b>18</b> | <b>MTP3140</b> | <b>B</b>    | <b>93.3</b> | <b>89.6-94.9</b> | <b>24.4</b> | <b>6.3</b> | <b>57</b> | <b>Af,D</b>    |
| <b>MSN</b>  | <b>18</b> | <b>MTP3140</b> | <b>1994</b> | <b>98.3</b> | <b>96.5-98.3</b> | <b>21.3</b> | <b>9.5</b> | <b>59</b> | <b>Af,Am</b>   |
| <b>MSN</b>  | <b>18</b> | <b>MTP3140</b> | <b>1998</b> | <b>94.9</b> | <b>93-96.5</b>   | <b>17.4</b> | <b>4.8</b> | <b>51</b> | <b>Af,Am,D</b> |
| <b>MSN</b>  | <b>18</b> | <b>MTP3140</b> | <b>1999</b> | <b>93.3</b> | <b>89.6-94.9</b> | <b>8.2</b>  | <b>4.7</b> | <b>27</b> | <b>Af,D</b>    |
|             |           |                |             |             |                  |             |            |           |                |
| TFSW        | 1         | SxG            | 2006        | 37.1        | 31.9-39.3        | 4.7         | 4.6        | 9         | Af,Am          |
| <b>TFSW</b> | <b>4</b>  | <b>SxG</b>     | <b>B</b>    | <b>56.0</b> | <b>51.7-56</b>   | <b>12.8</b> | <b>4.7</b> | <b>27</b> | <b>Af</b>      |
| <b>TFSW</b> | <b>4</b>  | <b>SxG</b>     | <b>2006</b> | <b>56.0</b> | <b>51.7-56</b>   | <b>14.2</b> | <b>4.6</b> | <b>29</b> | <b>Af</b>      |
| <b>TFSW</b> | <b>4</b>  | <b>SxG</b>     | <b>2007</b> | <b>56.0</b> | <b>51.7-56</b>   | <b>9.8</b>  | <b>4.6</b> | <b>22</b> | <b>Af</b>      |
| TFSW        | 5         | MTP3346        | B           | 7.3         | 2-13.3           | 10.1        | 3.7        | 11        | Af,Am          |
| TFSW        | 5         | MTP3346        | 2003        | 6.0         | 2-11.3           | 10.9        | 3.8        | 13        | Af,Am          |
| TFSW        | 8         | MTP3140        | 1998        | 64.3        | 56.3-69          | 5.6         | 5.0        | 3         | Af,Am          |
| TFSW        | 12        | MTP3346        | B           | 24.6        | 14.6-34.3        | 7.1         | 3.7        | 10        | Af,Am          |
| TFSW        | 12        | MTP3346        | 2003        | 24.6        | 14-34.3          | 5.7         | 3.8        | 8         | Af,Am          |
| TFSW        | 14        | MTP3234        | B           | 28.0        | 24-34            | 11.0        | 4.7        | 36        | Af,Am,D        |
| TFSW        | 14        | MTP3234        | 2004        | 30.0        | 24-34            | 12.8        | 4.5        | 41        | Af,D           |
| TFSW        | 14        | MTP3346        | B           | 27.9        | 21.9-33.9        | 12.6        | 3.7        | 19        | D              |
| TFSW        | 14        | MTP3346        | 2003        | 27.9        | 23.9-33.9        | 12.2        | 3.8        | 19        | D              |
| <b>TFSW</b> | <b>18</b> | <b>MTP3140</b> | <b>B</b>    | <b>93.0</b> | <b>91-93.3</b>   | <b>45.6</b> | <b>6.8</b> | <b>80</b> | <b>Af,Am</b>   |
| <b>TFSW</b> | <b>18</b> | <b>MTP3140</b> | <b>1996</b> | <b>93.0</b> | <b>91-93.3</b>   | <b>32.5</b> | <b>7.5</b> | <b>75</b> | <b>Af,Am</b>   |
| <b>TFSW</b> | <b>18</b> | <b>MTP3140</b> | <b>1998</b> | <b>93.0</b> | <b>91-93.3</b>   | <b>45.4</b> | <b>5.0</b> | <b>82</b> | <b>Af,Am</b>   |
| <b>TFSW</b> | <b>18</b> | <b>MTP3140</b> | <b>1999</b> | <b>91.0</b> | <b>89.6-93</b>   | <b>40.6</b> | <b>5.7</b> | <b>78</b> | <b>Af,Am</b>   |
|             |           |                |             |             |                  |             |            |           |                |
| <b>MSFW</b> | <b>1</b>  | <b>SxG</b>     | <b>B</b>    | <b>21.1</b> | <b>17.7-31.9</b> | <b>8.0</b>  | <b>4.6</b> | <b>13</b> | <b>Af,Am</b>   |
| <b>MSFW</b> | <b>1</b>  | <b>SxG</b>     | <b>B</b>    | <b>25.9</b> | <b>17.7-31.9</b> | <b>7.7</b>  | <b>4.6</b> | <b>13</b> | <b>Af,Am</b>   |
| <b>MSFW</b> | <b>1</b>  | <b>SxG</b>     | <b>2006</b> | <b>23.1</b> | <b>19.1-33.1</b> | <b>6.7</b>  | <b>4.7</b> | <b>15</b> | <b>Af,Am</b>   |
| <b>MSFW</b> | <b>1</b>  | <b>SxG</b>     | <b>2006</b> | <b>27.9</b> | <b>19.1-33.1</b> | <b>6.6</b>  | <b>4.7</b> | <b>15</b> | <b>Af,Am</b>   |
| <b>MSFW</b> | <b>1</b>  | <b>SxG</b>     | <b>2007</b> | <b>17.7</b> | <b>14-23.9</b>   | <b>5.8</b>  | <b>4.4</b> | <b>9</b>  | <b>Af,Am</b>   |
| <b>MSFW</b> | <b>1</b>  | <b>SxG</b>     | <b>2007</b> | <b>21.1</b> | <b>14-23.9</b>   | <b>5.8</b>  | <b>4.4</b> | <b>9</b>  | <b>Af,Am</b>   |
| <b>MSFW</b> | <b>2</b>  | <b>SxG</b>     | <b>B</b>    | <b>10.0</b> | <b>4-18</b>      | <b>18.3</b> | <b>4.6</b> | <b>40</b> | <b>Am,D</b>    |
| <b>MSFW</b> | <b>2</b>  | <b>SxG</b>     | <b>2005</b> | <b>12.0</b> | <b>4-18</b>      | <b>11.3</b> | <b>4.6</b> | <b>35</b> | <b>Am</b>      |
| <b>MSFW</b> | <b>2</b>  | <b>SxG</b>     | <b>2006</b> | <b>10.0</b> | <b>2-20</b>      | <b>7.8</b>  | <b>4.7</b> | <b>21</b> | <b>Am,D</b>    |
| <b>MSFW</b> | <b>2</b>  | <b>SxG</b>     | <b>2006</b> | <b>25.3</b> | <b>0-33.3</b>    | <b>5.7</b>  | <b>4.7</b> | <b>13</b> | <b>Am,D</b>    |

|             |           |                |             |             |                  |             |            |           |              |
|-------------|-----------|----------------|-------------|-------------|------------------|-------------|------------|-----------|--------------|
| <b>MSFW</b> | <b>2</b>  | <b>SxG</b>     | <b>2007</b> | <b>10.0</b> | <b>4-16</b>      | <b>21.4</b> | <b>4.4</b> | <b>45</b> | <b>Am,D</b>  |
| MSFW        | 5         | MTP3346        | B           | 6.0         | 0-11.3           | 10.8        | 3.8        | 13        | Af,Am        |
| MSFW        | 5         | MTP3346        | 2003        | 6.0         | 0-11.3           | 10.2        | 3.9        | 13        | Af,Am        |
| MSFW        | 11        | MTP3234        | 2004        | 35.0        | 25-62            | 4.7         | 4.6        | 14        | Af,Am        |
| <b>MSFW</b> | <b>12</b> | <b>MTP3140</b> | <b>B</b>    | <b>14.1</b> | <b>4.1-21</b>    | <b>6.5</b>  | <b>4.7</b> | <b>2</b>  | <b>Am,D</b>  |
| <b>MSFW</b> | <b>12</b> | <b>MTP3140</b> | <b>1995</b> | <b>4.1</b>  | <b>0-15</b>      | <b>6.7</b>  | <b>4.6</b> | <b>3</b>  | <b>Am,D</b>  |
| <b>MSFW</b> | <b>12</b> | <b>MTP3140</b> | <b>1999</b> | <b>15.0</b> | <b>2.1-23</b>    | <b>5.7</b>  | <b>5.1</b> | <b>3</b>  | <b>Am</b>    |
| MSFW        | 12        | MTP3346        | B           | 30.6        | 20.6-34.3        | 6.3         | 3.8        | 8         | Af,Am        |
| MSFW        | 12        | MTP3346        | 2003        | 30.6        | 18.6-34.3        | 6.0         | 3.9        | 8         | Af,Am        |
| MSFW        | 14        | MTP3140        | 1995        | 47.5        | 46.1-52.5        | 5.7         | 4.6        | 2         | Am           |
| MSFW        | 14        | MTP3234        | B           | 32.0        | 26-36            | 7.8         | 4.5        | 30        | Af,D         |
| MSFW        | 14        | MTP3234        | 2004        | 30.0        | 26-36            | 8.3         | 4.6        | 27        | Af,D         |
| MSFW        | 14        | MTP3346        | B           | 12.0        | 0-33.9           | 4.0         | 3.8        | 6         | D            |
| MSFW        | 14        | MTP3346        | 2003        | 27.9        | 19.9-35.9        | 4.4         | 3.9        | 7         | D            |
| MSFW        | 16        | MTP3234        | 2003        | 12.0        | 8-17             | 5.5         | 4.6        | 19        | Af,Am        |
| <b>MSFW</b> | <b>18</b> | <b>MTP3140</b> | <b>B</b>    | <b>93.0</b> | <b>91-93.3</b>   | <b>61.4</b> | <b>4.7</b> | <b>87</b> | <b>Af,Am</b> |
| <b>MSFW</b> | <b>18</b> | <b>MTP3140</b> | <b>1994</b> | <b>91.0</b> | <b>87.6-93</b>   | <b>31.5</b> | <b>5.3</b> | <b>76</b> | <b>Af,Am</b> |
| <b>MSFW</b> | <b>18</b> | <b>MTP3140</b> | <b>1995</b> | <b>91.0</b> | <b>87.6-93</b>   | <b>9.7</b>  | <b>4.6</b> | <b>1</b>  | <b>Af,D</b>  |
| <b>MSFW</b> | <b>18</b> | <b>MTP3140</b> | <b>1995</b> | <b>98.3</b> | <b>96.5-98.3</b> | <b>9.5</b>  | <b>4.6</b> | <b>8</b>  | <b>Am,D</b>  |
| <b>MSFW</b> | <b>18</b> | <b>MTP3140</b> | <b>1998</b> | <b>93.0</b> | <b>91-93.3</b>   | <b>46.3</b> | <b>4.9</b> | <b>87</b> | <b>Af,Am</b> |
| <b>MSFW</b> | <b>18</b> | <b>MTP3140</b> | <b>1999</b> | <b>91.0</b> | <b>89.6-93</b>   | <b>55.8</b> | <b>5.1</b> | <b>84</b> | <b>Af,Am</b> |
|             |           |                |             |             |                  |             |            |           |              |
| %SDM        | 4         | MTP3346        | B           | 14.0        | 4-15.9           | 4.1         | 3.8        | 5         | Af,Am        |
| %SDM        | 4         | MTP3346        | 2003        | 14.0        | 4-15.9           | 4.7         | 3.8        | 6         | Af,Am        |
| <b>%SDM</b> | <b>5</b>  | <b>MTP3346</b> | <b>B</b>    | <b>2.0</b>  | <b>0-6</b>       | <b>17.4</b> | <b>3.8</b> | <b>20</b> | <b>Af,Am</b> |
| <b>%SDM</b> | <b>5</b>  | <b>MTP3346</b> | <b>2003</b> | <b>2.0</b>  | <b>0-6</b>       | <b>13.8</b> | <b>3.8</b> | <b>17</b> | <b>Af,Am</b> |
| <b>%SDM</b> | <b>5</b>  | <b>MTP3346</b> | <b>2005</b> | <b>2.0</b>  | <b>0-6</b>       | <b>9.3</b>  | <b>4.0</b> | <b>31</b> | <b>Af,Am</b> |
| <b>%SDM</b> | <b>14</b> | <b>MTP3234</b> | <b>B</b>    | <b>37.0</b> | <b>24-41</b>     | <b>12.3</b> | <b>4.6</b> | <b>46</b> | <b>Am,D</b>  |
| <b>%SDM</b> | <b>14</b> | <b>MTP3234</b> | <b>B</b>    | <b>32.0</b> | <b>28-36</b>     | <b>16.1</b> | <b>4.6</b> | <b>51</b> | <b>Am,D</b>  |
| <b>%SDM</b> | <b>14</b> | <b>MTP3234</b> | <b>2003</b> | <b>32.0</b> | <b>26-36</b>     | <b>6.3</b>  | <b>4.9</b> | <b>35</b> | <b>Am,D</b>  |
| <b>%SDM</b> | <b>14</b> | <b>MTP3234</b> | <b>2004</b> | <b>32.0</b> | <b>26-36</b>     | <b>13.0</b> | <b>4.7</b> | <b>46</b> | <b>Am,D</b>  |
| <b>%SDM</b> | <b>18</b> | <b>MTP3140</b> | <b>B</b>    | <b>93.0</b> | <b>91-93.3</b>   | <b>47.9</b> | <b>4.6</b> | <b>84</b> | <b>Af,Am</b> |
| <b>%SDM</b> | <b>18</b> | <b>MTP3140</b> | <b>1998</b> | <b>89.6</b> | <b>87.6-91</b>   | <b>11.5</b> | <b>4.7</b> | <b>5</b>  | <b>Af,Am</b> |
| <b>%SDM</b> | <b>18</b> | <b>MTP3140</b> | <b>1998</b> | <b>93.0</b> | <b>87.6-93.3</b> | <b>10.4</b> | <b>4.7</b> | <b>3</b>  | <b>Af,Am</b> |
| <b>%SDM</b> | <b>18</b> | <b>MTP3140</b> | <b>1999</b> | <b>91.0</b> | <b>87.6-93</b>   | <b>33.3</b> | <b>5.2</b> | <b>35</b> | <b>Af,Am</b> |

QTLs present in at least two years are outlined in bold.

MBW: mean berry weight; MSN: mean seed number; TSWF: total seed fresh weight; MSFW: mean seed fresh weight; %SDM: seed dry matter percentage; RESN: residual berry weight unexplained by seed number; RESFW: residual berry weight unexplained by total seed fresh weight

CI: confidence interval

Major allelic effects: Af female, Am male, D dominance

<sup>1</sup> B stands for inter-year BLUP
