# Supplementary material for: New stable QTLs for berry weight do not colocalize with QTLs for seed traits in cultivated grapevine (Vitis vinifera L.)
Source: PubMed Central journal article supplement (PMC3878267; doi:10.1186/1471-2229-13-217), 2013-12-19
Supplement: 1471-2229-13-217-S11.pdf [file 1471-2229-13-217-S11.pdf]

**Additional file 11: Table S9** - Detailed features of all QTLs for seven seed and berry-related traits in four grapevine mapping populations (parental maps), derived with the CIM method.

| Trait        | LG        | Population     | Map      | Year        | QTL position (cM) |                        | QTL effect  |               |             |
|--------------|-----------|----------------|----------|-------------|-------------------|------------------------|-------------|---------------|-------------|
|              |           |                |          |             | LOD peak          | CI                     | LOD         | LOD threshold | %var        |
| MBW          | 1         | SG             | M        | 2006        | 16.6              | 12.11 - 22.61          | 4.3         | 3.7           | 6.4         |
| <b>MBW</b>   | <b>8</b>  | <b>SG</b>      | <b>F</b> | <b>2005</b> | <b>17.1</b>       | <b>6.01 - 27.11</b>    | <b>7.7</b>  | <b>3.8</b>    | <b>16.5</b> |
| <b>MBW</b>   | <b>8</b>  | <b>SG</b>      | <b>F</b> | <b>2006</b> | <b>23.1</b>       | <b>17.11 - 33.41</b>   | <b>9.4</b>  | <b>3.6</b>    | <b>20.3</b> |
| <b>MBW</b>   | <b>8</b>  | <b>SG</b>      | <b>F</b> | <b>2006</b> | <b>29.4</b>       | <b>15.11 - 37.41</b>   | <b>8.6</b>  | <b>3.6</b>    | <b>17.1</b> |
| <b>MBW</b>   | <b>8</b>  | <b>SG</b>      | <b>F</b> | <b>2007</b> | <b>8.0</b>        | <b>2.01 - 27.11</b>    | <b>5.3</b>  | <b>3.6</b>    | <b>12.5</b> |
| <b>MBW</b>   | <b>8</b>  | <b>SG</b>      | <b>F</b> | <b>2007</b> | <b>19.1</b>       | <b>0.01 - 27.11</b>    | <b>5.0</b>  | <b>3.6</b>    | <b>11.4</b> |
| MBW          | 8         | MTP3346        | F        | 2005        | 14.6              | 11.61 - 14.61          | 2.7         | 2.6           | 11.7        |
| MBW          | 12        | SG             | F        | 2005        | 6.0               | 0.01 - 14.01           | 4.9         | 3.8           | 14.7        |
| <b>MBW</b>   | <b>13</b> | <b>SG</b>      | <b>F</b> | <b>B</b>    | <b>0.0</b>        | <b>0.01 - 12.01</b>    | <b>5.9</b>  | <b>3.6</b>    | <b>16.5</b> |
| <b>MBW</b>   | <b>13</b> | <b>SG</b>      | <b>F</b> | <b>2005</b> | <b>4.0</b>        | <b>0.01 - 13.31</b>    | <b>4.4</b>  | <b>3.8</b>    | <b>10.8</b> |
| <b>MBW</b>   | <b>13</b> | <b>SG</b>      | <b>F</b> | <b>2006</b> | <b>0.0</b>        | <b>0.01 - 12.01</b>    | <b>4.9</b>  | <b>3.6</b>    | <b>12.8</b> |
| <b>MBW</b>   | <b>17</b> | <b>SG</b>      | <b>M</b> | <b>B</b>    | <b>15.7</b>       | <b>10.91 - 18.31</b>   | <b>15.0</b> | <b>3.8</b>    | <b>25.4</b> |
| <b>MBW</b>   | <b>17</b> | <b>SG</b>      | <b>M</b> | <b>2005</b> | <b>14.7</b>       | <b>9.91 - 18.31</b>    | <b>10.8</b> | <b>3.7</b>    | <b>19.1</b> |
| <b>MBW</b>   | <b>17</b> | <b>SG</b>      | <b>M</b> | <b>2006</b> | <b>13.7</b>       | <b>9.91 - 18.31</b>    | <b>8.9</b>  | <b>3.7</b>    | <b>14.1</b> |
| <b>MBW</b>   | <b>17</b> | <b>SG</b>      | <b>M</b> | <b>2007</b> | <b>16.7</b>       | <b>10.91 - 18.31</b>   | <b>14.2</b> | <b>3.8</b>    | <b>24.0</b> |
| MBW          | 18        | MTP3140        | F        | B           | 55.0              | 50.99 - 56.59          | 16.3        | 3.9           | 37.4        |
| MBW          | 18        | MTP3140        | M        | B           | 108.0             | 101.99 - 110.69        | 12.3        | 4.0           | 28.4        |
| MBW          | 18        | SG             | M        | B           | 38.2              | 24.21 - 49.71          | 4.5         | 3.8           | 7.1         |
| MBW          | 18        | SG             | M        | B           | 43.4              | 24.21 - 49.71          | 4.5         | 3.8           | 7.1         |
| MBW          | 18        | SG             | M        | 2006        | 38.2              | 25.21 - 48.41          | 4.9         | 3.7           | 8.3         |
| MBW          | 18        | SG             | M        | 2006        | 42.4              | 26.21 - 48.41          | 4.9         | 3.7           | 7.9         |
| <b>MBW</b>   | <b>18</b> | <b>MTP3140</b> | <b>F</b> | <b>1994</b> | <b>55.0</b>       | <b>50.99 - 56.59</b>   | <b>13.7</b> | <b>4.2</b>    | <b>34.2</b> |
| <b>MBW</b>   | <b>18</b> | <b>MTP3140</b> | <b>F</b> | <b>1995</b> | <b>55.0</b>       | <b>50.99 - 56.59</b>   | <b>11.1</b> | <b>4.2</b>    | <b>27.9</b> |
| <b>MBW</b>   | <b>18</b> | <b>MTP3140</b> | <b>F</b> | <b>1996</b> | <b>55.0</b>       | <b>50.99 - 58.19</b>   | <b>8.8</b>  | <b>4.1</b>    | <b>25.5</b> |
| <b>MBW</b>   | <b>18</b> | <b>MTP3140</b> | <b>F</b> | <b>1998</b> | <b>55.0</b>       | <b>50.99 - 56.59</b>   | <b>11.7</b> | <b>4.1</b>    | <b>31.0</b> |
| <b>MBW</b>   | <b>18</b> | <b>MTP3140</b> | <b>F</b> | <b>1999</b> | <b>55.0</b>       | <b>50.99 - 56.59</b>   | <b>11.9</b> | <b>4.2</b>    | <b>29.6</b> |
| <b>MBW</b>   | <b>18</b> | <b>MTP3140</b> | <b>M</b> | <b>1994</b> | <b>108.0</b>      | <b>103.99 - 110.69</b> | <b>12.7</b> | <b>4.1</b>    | <b>32.2</b> |
| <b>MBW</b>   | <b>18</b> | <b>MTP3140</b> | <b>M</b> | <b>1995</b> | <b>115.3</b>      | <b>113.49 - 115.29</b> | <b>9.7</b>  | <b>4.0</b>    | <b>23.6</b> |
| <b>MBW</b>   | <b>18</b> | <b>MTP3140</b> | <b>M</b> | <b>1996</b> | <b>106.0</b>      | <b>101.49 - 110.69</b> | <b>7.7</b>  | <b>4.3</b>    | <b>24.6</b> |
| <b>MBW</b>   | <b>18</b> | <b>MTP3140</b> | <b>M</b> | <b>1998</b> | <b>115.3</b>      | <b>113.49 - 115.29</b> | <b>10.4</b> | <b>4.4</b>    | <b>28.5</b> |
| <b>MBW</b>   | <b>18</b> | <b>MTP3140</b> | <b>M</b> | <b>1999</b> | <b>106.0</b>      | <b>101.49 - 110.69</b> | <b>10.4</b> | <b>4.2</b>    | <b>27.0</b> |
| RESFW        | 5         | MTP3346        | F        | B           | 3.0               | 0.01 - 7.21            | 4.0         | 2.4           | 5.7         |
| RESFW        | 5         | MTP3346        | F        | 2003        | 3.0               | 0.01 - 12.21           | 2.6         | 2.5           | 3.8         |
| <b>RESFW</b> | <b>8</b>  | <b>SG</b>      | <b>F</b> | <b>B</b>    | <b>8.0</b>        | <b>2.01 - 27.11</b>    | <b>8.4</b>  | <b>3.6</b>    | <b>17.2</b> |
| <b>RESFW</b> | <b>8</b>  | <b>SG</b>      | <b>F</b> | <b>B</b>    | <b>19.1</b>       | <b>2.01 - 27.11</b>    | <b>8.4</b>  | <b>3.6</b>    | <b>16.7</b> |
| <b>RESFW</b> | <b>8</b>  | <b>SG</b>      | <b>F</b> | <b>2005</b> | <b>17.1</b>       | <b>12.01 - 33.41</b>   | <b>6.6</b>  | <b>3.8</b>    | <b>14.0</b> |
| <b>RESFW</b> | <b>8</b>  | <b>SG</b>      | <b>F</b> | <b>2006</b> | <b>21.1</b>       | <b>15.11 - 27.11</b>   | <b>8.3</b>  | <b>3.7</b>    | <b>19.6</b> |
| <b>RESFW</b> | <b>8</b>  | <b>SG</b>      | <b>F</b> | <b>2007</b> | <b>8.0</b>        | <b>2.01 - 25.11</b>    | <b>6.2</b>  | <b>3.6</b>    | <b>13.5</b> |
| <b>RESFW</b> | <b>8</b>  | <b>SG</b>      | <b>F</b> | <b>2007</b> | <b>17.1</b>       | <b>0.01 - 27.11</b>    | <b>5.7</b>  | <b>3.6</b>    | <b>11.6</b> |
| RESFW        | 8         | MTP3346        | F        | 2005        | 14.6              | 11.61 - 14.61          | 2.8         | 2.6           | 12.0        |
| RESFW        | 11        | MTP3140        | M        | 1998        | 20.2              | 8.19 - 27.49           | 4.3         | 4.1           | 11.2        |
| RESFW        | 11        | MTP3346        | M        | B           | 2.0               | 0.01 - 7.01            | 3.0         | 2.5           | 5.4         |
| RESFW        | 11        | MTP3346        | M        | 2003        | 0.0               | 0.01 - 7.01            | 2.8         | 2.4           | 3.8         |
| <b>RESFW</b> | <b>13</b> | <b>SG</b>      | <b>F</b> | <b>B</b>    | <b>0.0</b>        | <b>0.01 - 8.01</b>     | <b>5.5</b>  | <b>3.6</b>    | <b>13.6</b> |
| <b>RESFW</b> | <b>13</b> | <b>SG</b>      | <b>F</b> | <b>2005</b> | <b>0.0</b>        | <b>0.01 - 12.01</b>    | <b>4.2</b>  | <b>3.8</b>    | <b>11.8</b> |

|       |    |         |   |      |      |               |      |     |      |
|-------|----|---------|---|------|------|---------------|------|-----|------|
| RESFW | 13 | SG      | F | 2007 | 0.0  | 0.01 - 8.01   | 4.2  | 3.6 | 11.8 |
| RESFW | 17 | SG      | M | B    | 15.7 | 9.91 - 18.31  | 15.3 | 3.7 | 23.5 |
| RESFW | 17 | SG      | M | 2005 | 16.7 | 10.91 - 18.31 | 10.6 | 3.9 | 20.0 |
| RESFW | 17 | SG      | M | 2006 | 13.7 | 9.91 - 18.31  | 9.4  | 3.6 | 14.8 |
| RESFW | 17 | SG      | M | 2007 | 15.7 | 9.91 - 18.31  | 15.0 | 3.8 | 24.2 |
| RESFW | 17 | MTP3140 | M | B    | 23.1 | 17.51 - 25.21 | 5.7  | 4.1 | 14.6 |
| RESFW | 17 | MTP3140 | M | 1994 | 25.1 | 19.51 - 29.21 | 5.0  | 4.3 | 14.5 |
| RESFW | 17 | MTP3140 | M | 1995 | 25.2 | 19.51 - 31.21 | 4.8  | 4.1 | 14.0 |
| RESFW | 17 | MTP3140 | M | 1998 | 23.1 | 17.51 - 25.21 | 4.4  | 4.1 | 12.1 |
| RESFW | 17 | MTP3140 | M | 1999 | 23.1 | 16.61 - 25.21 | 4.5  | 4.5 | 13.1 |
| RESFW | 18 | SG      | M | B    | 36.2 | 24.21 - 49.41 | 5.6  | 3.7 | 8.7  |
| RESFW | 18 | SG      | M | B    | 43.4 | 24.21 - 49.41 | 5.7  | 3.7 | 8.2  |
| RESFW | 18 | SG      | M | 2005 | 39.2 | 26.21 - 49.71 | 4.6  | 3.9 | 8.6  |
| RESFW | 18 | SG      | M | 2005 | 43.4 | 27.21 - 49.71 | 4.6  | 3.9 | 8.4  |
| RESFW | 18 | SG      | M | 2006 | 36.2 | 25.21 - 49.41 | 5.6  | 3.6 | 9.9  |
| RESFW | 18 | SG      | M | 2006 | 43.4 | 25.21 - 49.41 | 5.6  | 3.6 | 9.2  |
| RESFW | 18 | SG      | M | 2007 | 44.4 | 29.21 - 49.71 | 5.4  | 3.8 | 8.3  |
| RESFW | 19 | MTP3234 | F | B    | 44.0 | 24.01 - 50.91 | 3.8  | 3.6 | 9.3  |
| RESFW | 19 | MTP3234 | F | 2003 | 50.9 | 44.01 - 56.91 | 6.1  | 3.7 | 18.4 |
|       |    |         |   |      |      |               |      |     |      |
| RESN  | 1  | SG      | M | B    | 16.6 | 12.11 - 22.91 | 4.4  | 3.7 | 5.9  |
| RESN  | 1  | SG      | M | 2005 | 25.9 | 16.61 - 41.91 | 4.3  | 3.6 | 7.1  |
| RESN  | 1  | SG      | M | 2005 | 31.1 | 21.61 - 39.21 | 4.9  | 3.6 | 8.6  |
| RESN  | 1  | SG      | M | 2006 | 16.6 | 12.11 - 22.61 | 4.1  | 3.7 | 6.1  |
| RESN  | 4  | MTP3140 | F | 1994 | 33.0 | 28.79 - 38.79 | 4.2  | 4.1 | 11.1 |
| RESN  | 5  | MTP3346 | F | B    | 3.0  | 0.01 - 7.21   | 3.3  | 2.4 | 4.7  |
| RESN  | 7  | MTP3234 | F | 2003 | 13.7 | 11.71 - 19.71 | 4.3  | 3.7 | 14.9 |
| RESN  | 8  | SG      | F | B    | 10.0 | 2.01 - 27.11  | 8.7  | 3.8 | 18.0 |
| RESN  | 8  | SG      | F | B    | 19.1 | 4.01 - 27.11  | 8.8  | 3.8 | 18.3 |
| RESN  | 8  | SG      | F | 2005 | 10.0 | 2.01 - 25.11  | 7.1  | 3.6 | 15.4 |
| RESN  | 8  | SG      | F | 2005 | 15.1 | 2.01 - 27.11  | 6.8  | 3.6 | 14.1 |
| RESN  | 8  | SG      | F | 2005 | 29.4 | 0.01 - 39.41  | 5.5  | 3.6 | 11.8 |
| RESN  | 8  | SG      | F | 2006 | 23.1 | 15.11 - 35.41 | 8.7  | 3.7 | 19.5 |
| RESN  | 8  | SG      | F | 2006 | 29.4 | 15.11 - 37.41 | 8.0  | 3.7 | 16.7 |
| RESN  | 8  | SG      | F | 2007 | 8.0  | 0.01 - 27.41  | 4.7  | 3.5 | 11.0 |
| RESN  | 8  | SG      | F | 2007 | 19.1 | 0.01 - 27.41  | 4.7  | 3.5 | 10.7 |
| RESN  | 8  | MTP3346 | F | 2005 | 14.6 | 11.61 - 14.61 | 2.8  | 2.6 | 12.0 |
| RESN  | 11 | MTP3234 | F | B    | 12.0 | 2.01 - 24.11  | 5.5  | 3.6 | 16.5 |
| RESN  | 11 | MTP3234 | F | 2004 | 14.0 | 4.01 - 24.11  | 5.2  | 3.6 | 16.2 |
| RESN  | 11 | MTP3140 | F | B    | 14.9 | 10.09 - 22.89 | 5.1  | 3.9 | 12.9 |
| RESN  | 11 | MTP3140 | F | 1994 | 14.9 | 10.09 - 22.89 | 4.8  | 4.1 | 12.8 |
| RESN  | 11 | MTP3140 | F | 1994 | 11.4 | 10.09 - 22.89 | 5.0  | 4.1 | 13.6 |
| RESN  | 11 | MTP3140 | F | 1996 | 16.9 | 11.39 - 22.89 | 6.0  | 4.1 | 19.8 |
| RESN  | 11 | MTP3346 | M | B    | 2.0  | 0.01 - 8.01   | 2.8  | 2.5 | 5.0  |
| RESN  | 11 | MTP3346 | M | 2003 | 1.0  | 0.01 - 7.01   | 2.8  | 2.5 | 4.4  |
| RESN  | 13 | SG      | F | B    | 0.0  | 0.01 - 10.01  | 4.3  | 3.8 | 11.3 |
| RESN  | 13 | SG      | F | 2006 | 0.0  | 0.01 - 12.01  | 4.2  | 3.7 | 11.9 |
| RESN  | 17 | SG      | M | B    | 14.7 | 9.91 - 18.31  | 14.3 | 3.7 | 22.6 |
| RESN  | 17 | SG      | M | 2005 | 12.9 | 8.01 - 18.31  | 9.4  | 3.6 | 18.9 |

|      |    |         |   |      |       |                 |      |     |      |
|------|----|---------|---|------|-------|-----------------|------|-----|------|
| RESN | 17 | SG      | M | 2005 | 15.7  | 8.01 - 18.31    | 9.5  | 3.6 | 19.4 |
| RESN | 17 | SG      | M | 2006 | 13.7  | 9.91 - 18.31    | 8.6  | 3.7 | 13.7 |
| RESN | 17 | SG      | M | 2007 | 15.7  | 9.91 - 18.31    | 13.9 | 3.6 | 23.2 |
| RESN | 17 | MTP3140 | M | B    | 25.1  | 19.51 - 31.21   | 6.2  | 4.1 | 14.0 |
| RESN | 17 | MTP3140 | M | 1994 | 25.2  | 21.11 - 31.21   | 5.1  | 4.1 | 13.6 |
| RESN | 17 | MTP3140 | M | 1995 | 25.2  | 21.11 - 31.21   | 6.0  | 4.1 | 14.8 |
| RESN | 17 | MTP3140 | M | 1998 | 23.1  | 17.51 - 25.21   | 5.7  | 4.3 | 15.5 |
| RESN | 18 | SG      | M | B    | 32.2  | 20.21 - 47.41   | 5.0  | 3.7 | 8.9  |
| RESN | 18 | SG      | M | 2006 | 37.2  | 25.21 - 47.41   | 5.2  | 3.7 | 9.1  |
| RESN | 18 | SG      | M | 2006 | 42.4  | 24.21 - 48.41   | 5.2  | 3.7 | 8.3  |
| RESN | 18 | MTP3140 | F | B    | 55.0  | 50.99 - 56.59   | 5.3  | 3.9 | 12.4 |
| RESN | 18 | MTP3140 | F | 1995 | 70.9  | 60.89 - 76.89   | 4.4  | 4.1 | 14.4 |
| RESN | 18 | MTP3140 | F | 1998 | 55.0  | 50.99 - 56.59   | 4.6  | 4.1 | 11.8 |
| RESN | 18 | MTP3140 | F | 1999 | 55.0  | 50.99 - 58.19   | 8.2  | 4.1 | 22.4 |
| RESN | 18 | MTP3140 | M | B    | 106.0 | 101.49 - 111.49 | 8.1  | 4.1 | 19.0 |
| RESN | 18 | MTP3140 | M | 1994 | 106.0 | 101.49 - 111.49 | 5.1  | 4.1 | 13.8 |
| RESN | 18 | MTP3140 | M | 1995 | 102.0 | 101.49 - 110.69 | 7.0  | 4.1 | 16.9 |
| RESN | 18 | MTP3140 | M | 1998 | 108.7 | 101.99 - 111.49 | 7.2  | 4.3 | 19.5 |
| RESN | 18 | MTP3140 | M | 1999 | 111.5 | 96.89 - 115.29  | 7.6  | 4.2 | 19.2 |
| RESN | 18 | MTP3140 | M | 1999 | 106.0 | 97.89 - 110.69  | 8.7  | 4.2 | 22.4 |
| RESN | 18 | MTP3140 | M | 1999 | 99.9  | 96.89 - 115.29  | 8.2  | 4.2 | 20.3 |
| RESN | 18 | MTP3140 | M | 1999 | 94.9  | 89.89 - 115.29  | 6.6  | 4.2 | 18.2 |
| RESN | 19 | MTP3234 | F | 2003 | 44.9  | 30.01 - 50.91   | 6.1  | 3.7 | 17.6 |
|      |    |         |   |      |       |                 |      |     |      |
| MSN  | 2  | SG      | F | B    | 16.0  | 6.01 - 25.71    | 5.2  | 3.6 | 12.4 |
| MSN  | 2  | SG      | F | 2007 | 12.0  | 4.01 - 21.71    | 10.1 | 3.7 | 22.6 |
| MSN  | 2  | SG      | M | B    | 11.0  | 4.01 - 18.01    | 6.9  | 3.7 | 19.4 |
| MSN  | 2  | SG      | M | 2005 | 17.0  | 9.01 - 24.91    | 4.7  | 3.6 | 15.3 |
| MSN  | 2  | SG      | M | 2005 | 20.9  | 8.01 - 25.91    | 4.5  | 3.6 | 10.1 |
| MSN  | 2  | SG      | M | 2007 | 12.0  | 5.01 - 20.01    | 7.8  | 3.7 | 20.0 |
| MSN  | 4  | SG      | F | B    | 48.3  | 40.31 - 48.31   | 13.6 | 3.6 | 25.7 |
| MSN  | 4  | SG      | F | 2005 | 48.3  | 42.31 - 48.31   | 8.5  | 3.7 | 18.9 |
| MSN  | 4  | SG      | F | 2006 | 48.3  | 44.31 - 48.31   | 6.5  | 3.7 | 11.4 |
| MSN  | 4  | SG      | F | 2007 | 46.3  | 40.31 - 48.31   | 9.1  | 3.7 | 17.8 |
| MSN  | 5  | MTP3140 | M | 1994 | 39.3  | 35.49 - 46.09   | 4.7  | 4.1 | 12.1 |
| MSN  | 8  | MTP3234 | M | 2004 | 64.4  | 54.71 - 80.31   | 4.2  | 3.6 | 11.2 |
| MSN  | 8  | MTP3234 | M | 2004 | 68.3  | 54.71 - 80.31   | 4.2  | 3.6 | 11.3 |
| MSN  | 13 | SG      | M | B    | 21.6  | 12.61 - 30.41   | 3.9  | 3.7 | 9.7  |
| MSN  | 14 | MTP3234 | F | B    | 25.5  | 16.01 - 27.11   | 3.7  | 3.5 | 9.2  |
| MSN  | 14 | MTP3346 | M | B    | 28.0  | 16.01 - 31.01   | 3.8  | 2.5 | 5.4  |
| MSN  | 14 | MTP3346 | M | 2003 | 26.0  | 13.01 - 31.01   | 3.2  | 2.5 | 4.8  |
| MSN  | 18 | MTP3140 | F | B    | 53.0  | 50.99 - 58.19   | 11.5 | 3.9 | 27.9 |
| MSN  | 18 | MTP3140 | F | 1994 | 55.0  | 50.99 - 58.19   | 11.4 | 4.0 | 28.8 |
| MSN  | 18 | MTP3140 | F | 1995 | 53.0  | 50.99 - 58.19   | 9.9  | 4.0 | 26.9 |
| MSN  | 18 | MTP3140 | F | 1996 | 64.9  | 40.79 - 72.89   | 7.6  | 4.1 | 26.0 |
| MSN  | 18 | MTP3140 | F | 1996 | 55.0  | 50.99 - 58.19   | 10.0 | 4.1 | 26.4 |
| MSN  | 18 | MTP3140 | F | 1996 | 46.7  | 42.69 - 60.59   | 8.3  | 4.1 | 26.5 |
| MSN  | 18 | MTP3140 | F | 1998 | 53.0  | 50.69 - 58.19   | 4.0  | 4.0 | 11.8 |
| MSN  | 18 | MTP3140 | M | B    | 115.3 | 113.49 - 115.29 | 4.9  | 4.2 | 11.7 |

|             |           |                |          |             |              |                        |             |            |             |
|-------------|-----------|----------------|----------|-------------|--------------|------------------------|-------------|------------|-------------|
| <b>MSN</b>  | <b>18</b> | <b>MTP3140</b> | <b>M</b> | <b>1994</b> | <b>115.3</b> | <b>113.49 - 115.29</b> | <b>6.5</b>  | <b>4.1</b> | <b>17.5</b> |
| <b>MSN</b>  | <b>18</b> | <b>MTP3140</b> | <b>M</b> | <b>1996</b> | <b>115.3</b> | <b>113.49 - 115.29</b> | <b>4.4</b>  | <b>4.2</b> | <b>13.0</b> |
| <b>MSN</b>  | <b>18</b> | <b>MTP3140</b> | <b>M</b> | <b>1998</b> | <b>115.3</b> | <b>113.49 - 115.29</b> | <b>4.7</b>  | <b>4.1</b> | <b>12.5</b> |
| MSN         | 18        | MTP3346        | F        | B           | 22.0         | 13.01 - 25.01          | 2.7         | 2.5        | 4.5         |
|             |           |                |          |             |              |                        |             |            |             |
| TFSW        | 1         | SG             | F        | B           | 39.8         | 36.81 - 47.81          | 4.4         | 3.7        | 7.1         |
| TFSW        | 1         | SG             | F        | 2006        | 38.6         | 31.21 - 39.81          | 4.0         | 3.7        | 6.6         |
| TFSW        | 2         | SG             | F        | 2007        | 21.7         | 12.01 - 27.71          | 4.3         | 3.7        | 7.1         |
| TFSW        | 4         | SG             | F        | B           | 48.3         | 44.31 - 48.31          | 16.5        | 3.7        | 31.7        |
| <b>TFSW</b> | <b>4</b>  | <b>SG</b>      | <b>F</b> | <b>2005</b> | <b>48.3</b>  | <b>42.31 - 48.31</b>   | <b>5.0</b>  | <b>3.6</b> | <b>12.1</b> |
| <b>TFSW</b> | <b>4</b>  | <b>SG</b>      | <b>F</b> | <b>2006</b> | <b>48.3</b>  | <b>44.31 - 48.31</b>   | <b>12.0</b> | <b>3.7</b> | <b>22.6</b> |
| <b>TFSW</b> | <b>4</b>  | <b>SG</b>      | <b>F</b> | <b>2007</b> | <b>48.3</b>  | <b>44.31 - 48.31</b>   | <b>12.4</b> | <b>3.7</b> | <b>24.0</b> |
| TFSW        | 5         | MTP3346        | F        | B           | 7.0          | 0.01 - 10.21           | 4.0         | 2.4        | 5.5         |
| TFSW        | 5         | MTP3346        | F        | B           | 17.2         | 14.21 - 18.11          | 3.0         | 2.4        | 4.8         |
| TFSW        | 5         | MTP3346        | F        | 2003        | 7.2          | 1.01 - 10.21           | 5.7         | 2.4        | 8.0         |
| TFSW        | 5         | MTP3346        | F        | 2003        | 17.2         | 15.21 - 18.11          | 3.3         | 2.4        | 5.3         |
| TFSW        | 8         | MTP3234        | M        | B           | 92.1         | 84.11 - 92.11          | 4.0         | 3.7        | 9.4         |
| <b>TFSW</b> | <b>13</b> | <b>SG</b>      | <b>M</b> | <b>2005</b> | <b>34.4</b>  | <b>30.21 - 46.41</b>   | <b>4.7</b>  | <b>3.7</b> | <b>11.3</b> |
| <b>TFSW</b> | <b>13</b> | <b>SG</b>      | <b>M</b> | <b>2007</b> | <b>27.2</b>  | <b>13.61 - 30.41</b>   | <b>4.1</b>  | <b>3.7</b> | <b>8.7</b>  |
| TFSW        | 14        | MTP3234        | F        | B           | 29.1         | 22.01 - 37.11          | 4.8         | 3.6        | 12.1        |
| TFSW        | 14        | MTP3234        | F        | 2004        | 25.5         | 22.01 - 37.11          | 5.5         | 3.6        | 14.7        |
| TFSW        | 14        | MTP3234        | F        | 2004        | 31.1         | 22.01 - 37.11          | 5.6         | 3.6        | 16.4        |
| TFSW        | 16        | MTP3234        | F        | B           | 20.6         | 4.79 - 34.59           | 5.1         | 3.6        | 19.8        |
| TFSW        | 16        | MTP3234        | F        | 2003        | 10.8         | 4.79 - 32.59           | 4.4         | 3.8        | 13.1        |
| <b>TFSW</b> | <b>18</b> | <b>MTP3140</b> | <b>F</b> | <b>B</b>    | <b>55.0</b>  | <b>50.99 - 56.59</b>   | <b>20.3</b> | <b>4.2</b> | <b>43.7</b> |
| <b>TFSW</b> | <b>18</b> | <b>MTP3140</b> | <b>F</b> | <b>1994</b> | <b>55.0</b>  | <b>50.99 - 56.59</b>   | <b>18.4</b> | <b>4.2</b> | <b>42.2</b> |
| <b>TFSW</b> | <b>18</b> | <b>MTP3140</b> | <b>F</b> | <b>1995</b> | <b>55.0</b>  | <b>50.99 - 56.59</b>   | <b>5.7</b>  | <b>4.2</b> | <b>10.2</b> |
| <b>TFSW</b> | <b>18</b> | <b>MTP3140</b> | <b>F</b> | <b>1996</b> | <b>55.0</b>  | <b>50.99 - 58.19</b>   | <b>13.3</b> | <b>4.1</b> | <b>34.9</b> |
| <b>TFSW</b> | <b>18</b> | <b>MTP3140</b> | <b>F</b> | <b>1998</b> | <b>55.0</b>  | <b>50.99 - 56.59</b>   | <b>14.5</b> | <b>4.1</b> | <b>36.9</b> |
| <b>TFSW</b> | <b>18</b> | <b>MTP3140</b> | <b>F</b> | <b>1999</b> | <b>53.0</b>  | <b>50.99 - 56.59</b>   | <b>17.2</b> | <b>4.0</b> | <b>44.3</b> |
| <b>TFSW</b> | <b>18</b> | <b>MTP3140</b> | <b>M</b> | <b>B</b>    | <b>115.3</b> | <b>113.49 - 115.29</b> | <b>15.4</b> | <b>4.0</b> | <b>35.8</b> |
| <b>TFSW</b> | <b>18</b> | <b>MTP3140</b> | <b>M</b> | <b>1994</b> | <b>115.3</b> | <b>113.49 - 115.29</b> | <b>11.9</b> | <b>4.3</b> | <b>31.2</b> |
| <b>TFSW</b> | <b>18</b> | <b>MTP3140</b> | <b>M</b> | <b>1995</b> | <b>115.3</b> | <b>113.49 - 115.29</b> | <b>10.3</b> | <b>4.2</b> | <b>27.2</b> |
| <b>TFSW</b> | <b>18</b> | <b>MTP3140</b> | <b>M</b> | <b>1996</b> | <b>115.3</b> | <b>113.49 - 115.29</b> | <b>12.3</b> | <b>4.3</b> | <b>34.4</b> |
| <b>TFSW</b> | <b>18</b> | <b>MTP3140</b> | <b>M</b> | <b>1998</b> | <b>115.3</b> | <b>113.49 - 115.29</b> | <b>16.5</b> | <b>4.1</b> | <b>40.4</b> |
| TFSW        | 19        | SG             | M        | 2007        | 38.8         | 31.51 - 46.21          | 4.1         | 3.7        | 8.7         |
|             |           |                |          |             |              |                        |             |            |             |
| MSFW        | 1         | SG             | F        | B           | 23.6         | 19.61 - 24.41          | 4.9         | 3.7        | 10.3        |
| MSFW        | 1         | SG             | F        | B           | 25.2         | 18.01 - 31.21          | 3.8         | 3.7        | 8.0         |
| MSFW        | 1         | SG             | F        | 2007        | 27.2         | 21.61 - 32.81          | 4.3         | 3.7        | 8.6         |
| MSFW        | 1         | SG             | M        | 2006        | 29.1         | 22.61 - 34.21          | 5.0         | 3.6        | 10.5        |
| MSFW        | 2         | SG             | F        | B           | 12.0         | 0.01 - 27.71           | 4.7         | 3.7        | 12.2        |
| MSFW        | 2         | SG             | F        | 2007        | 6.0          | 0.01 - 16.01           | 5.2         | 3.7        | 13.3        |
| <b>MSFW</b> | <b>2</b>  | <b>SG</b>      | <b>M</b> | <b>B</b>    | <b>4.0</b>   | <b>0.01 - 13.01</b>    | <b>6.3</b>  | <b>3.7</b> | <b>15.5</b> |
| <b>MSFW</b> | <b>2</b>  | <b>SG</b>      | <b>M</b> | <b>2005</b> | <b>8.0</b>   | <b>0.01 - 17.01</b>    | <b>5.5</b>  | <b>3.7</b> | <b>14.8</b> |
| <b>MSFW</b> | <b>2</b>  | <b>SG</b>      | <b>M</b> | <b>2007</b> | <b>7.0</b>   | <b>0.01 - 15.01</b>    | <b>9.1</b>  | <b>3.7</b> | <b>22.9</b> |
| MSFW        | 5         | MTP3346        | F        | B           | 5.0          | 0.01 - 10.21           | 5.3         | 2.5        | 7.3         |
| MSFW        | 5         | MTP3346        | F        | B           | 17.2         | 15.21 - 18.11          | 3.3         | 2.5        | 5.1         |
| MSFW        | 5         | MTP3346        | F        | 2003        | 6.0          | 0.01 - 10.21           | 6.4         | 2.6        | 9.0         |

|             |           |                |          |             |              |                        |             |            |             |
|-------------|-----------|----------------|----------|-------------|--------------|------------------------|-------------|------------|-------------|
| MSFW        | 5         | MTP3346        | F        | 2003        | 17.2         | 15.21 - 18.11          | 3.5         | 2.6        | 5.5         |
| MSFW        | 5         | MTP3346        | M        | 2005        | 2.0          | 0.01 - 4.01            | 3.3         | 2.6        | 26.9        |
| MSFW        | 11        | MTP3234        | F        | 2004        | 12.0         | 2.01 - 28.11           | 5.1         | 3.6        | 15.8        |
| MSFW        | 12        | MTP3346        | M        | B           | 27.8         | 20.81 - 32.81          | 2.7         | 2.6        | 5.1         |
| MSFW        | 12        | MTP3346        | M        | 2003        | 28.8         | 20.81 - 32.81          | 2.6         | 2.6        | 4.7         |
| MSFW        | 14        | MTP3234        | F        | B           | 25.5         | 22.01 - 35.11          | 3.5         | 3.5        | 9.0         |
| <b>MSFW</b> | <b>18</b> | <b>MTP3140</b> | <b>F</b> | <b>B</b>    | <b>55.0</b>  | <b>50.99 - 56.59</b>   | <b>19.3</b> | <b>4.2</b> | <b>42.5</b> |
| <b>MSFW</b> | <b>18</b> | <b>MTP3140</b> | <b>F</b> | <b>1995</b> | <b>55.0</b>  | <b>50.99 - 56.59</b>   | <b>8.2</b>  | <b>4.5</b> | <b>25.8</b> |
| <b>MSFW</b> | <b>18</b> | <b>MTP3140</b> | <b>F</b> | <b>1998</b> | <b>55.0</b>  | <b>50.99 - 56.59</b>   | <b>14.2</b> | <b>4.2</b> | <b>39.5</b> |
| <b>MSFW</b> | <b>18</b> | <b>MTP3140</b> | <b>F</b> | <b>1999</b> | <b>55.0</b>  | <b>50.99 - 56.59</b>   | <b>17.0</b> | <b>4.1</b> | <b>43.1</b> |
| <b>MSFW</b> | <b>18</b> | <b>MTP3140</b> | <b>M</b> | <b>1994</b> | <b>106.0</b> | <b>101.99 - 110.69</b> | <b>5.6</b>  | <b>4.4</b> | <b>17.4</b> |
| <b>MSFW</b> | <b>18</b> | <b>MTP3140</b> | <b>M</b> | <b>1995</b> | <b>111.5</b> | <b>110.69 - 115.29</b> | <b>5.7</b>  | <b>4.3</b> | <b>20.6</b> |
| <b>MSFW</b> | <b>18</b> | <b>MTP3140</b> | <b>M</b> | <b>1996</b> | <b>104.0</b> | <b>101.49 - 108.69</b> | <b>7.0</b>  | <b>4.5</b> | <b>22.0</b> |
| <b>MSFW</b> | <b>18</b> | <b>MTP3140</b> | <b>M</b> | <b>1998</b> | <b>108.0</b> | <b>101.99 - 111.49</b> | <b>12.4</b> | <b>4.2</b> | <b>35.2</b> |
|             |           |                |          |             |              |                        |             |            |             |
| %SDM        | 4         | MTP3346        | M        | B           | 1.0          | 0.01 - 2.01            | 2.7         | 2.5        | 11.3        |
| <b>%SDM</b> | <b>5</b>  | <b>MTP3346</b> | <b>F</b> | <b>B</b>    | <b>1.0</b>   | <b>0.01 - 7.01</b>     | <b>6.0</b>  | <b>2.5</b> | <b>7.5</b>  |
| <b>%SDM</b> | <b>5</b>  | <b>MTP3346</b> | <b>F</b> | <b>2003</b> | <b>2.0</b>   | <b>0.01 - 7.21</b>     | <b>4.4</b>  | <b>2.5</b> | <b>5.9</b>  |
| <b>%SDM</b> | <b>5</b>  | <b>MTP3346</b> | <b>F</b> | <b>2005</b> | <b>0.0</b>   | <b>0.01 - 6.01</b>     | <b>4.8</b>  | <b>2.6</b> | <b>14.1</b> |
| %SDM        | 5         | MTP3346        | M        | B           | 0.0          | 0.01 - 3.01            | 5.3         | 2.5        | 6.0         |
| %SDM        | 5         | MTP3346        | M        | 2003        | 0.0          | 0.01 - 3.01            | 4.9         | 2.4        | 5.7         |
| %SDM        | 14        | MTP3234        | M        | B           | 27.5         | 16.01 - 35.51          | 6.1         | 3.7        | 18.0        |
| %SDM        | 14        | MTP3234        | M        | 2004        | 18.0         | 14.01 - 37.51          | 4.0         | 3.7        | 9.9         |
| %SDM        | 14        | MTP3234        | M        | 2004        | 27.5         | 14.01 - 37.51          | 4.1         | 3.7        | 11.9        |
| %SDM        | 17        | MTP3140        | F        | 1996        | 31.0         | 17.39 - 43.09          | 4.6         | 4.4        | 15.7        |
| <b>%SDM</b> | <b>18</b> | <b>MTP3140</b> | <b>F</b> | <b>B</b>    | <b>55.0</b>  | <b>50.69 - 58.19</b>   | <b>17.8</b> | <b>4.2</b> | <b>41.2</b> |
| <b>%SDM</b> | <b>18</b> | <b>MTP3140</b> | <b>F</b> | <b>1994</b> | <b>55.0</b>  | <b>50.69 - 58.19</b>   | <b>6.4</b>  | <b>4.4</b> | <b>22.9</b> |
| <b>%SDM</b> | <b>18</b> | <b>MTP3140</b> | <b>F</b> | <b>1995</b> | <b>53.0</b>  | <b>46.69 - 56.59</b>   | <b>8.0</b>  | <b>4.3</b> | <b>27.5</b> |
| <b>%SDM</b> | <b>18</b> | <b>MTP3140</b> | <b>F</b> | <b>1996</b> | <b>55.0</b>  | <b>50.99 - 58.19</b>   | <b>5.7</b>  | <b>4.4</b> | <b>25.1</b> |
| <b>%SDM</b> | <b>18</b> | <b>MTP3140</b> | <b>F</b> | <b>1998</b> | <b>55.0</b>  | <b>50.99 - 56.59</b>   | <b>13.3</b> | <b>4.1</b> | <b>37.9</b> |
| <b>%SDM</b> | <b>18</b> | <b>MTP3140</b> | <b>F</b> | <b>1999</b> | <b>55.0</b>  | <b>50.69 - 56.59</b>   | <b>13.7</b> | <b>4.1</b> | <b>37.2</b> |
| <b>%SDM</b> | <b>18</b> | <b>MTP3140</b> | <b>M</b> | <b>1994</b> | <b>115.3</b> | <b>113.49 - 115.29</b> | <b>9.9</b>  | <b>4.4</b> | <b>33.8</b> |
| <b>%SDM</b> | <b>18</b> | <b>MTP3140</b> | <b>M</b> | <b>1995</b> | <b>111.5</b> | <b>107.99 - 115.29</b> | <b>8.2</b>  | <b>4.8</b> | <b>29.1</b> |
| <b>%SDM</b> | <b>18</b> | <b>MTP3140</b> | <b>M</b> | <b>1996</b> | <b>108.0</b> | <b>101.49 - 111.49</b> | <b>5.0</b>  | <b>4.5</b> | <b>20.6</b> |
| <b>%SDM</b> | <b>18</b> | <b>MTP3140</b> | <b>M</b> | <b>1999</b> | <b>115.3</b> | <b>113.49 - 115.29</b> | <b>13.6</b> | <b>4.3</b> | <b>36.7</b> |

QTLs present in at least two years are shown in bold.

M: male; F: female

CI: confidence interval

MBW: mean berry weight; MSN: mean seed number; TSWF: total seed fresh weight; MSFW: mean seed fresh weight; %SDM: seed dry matter percentage; RESN: residual berry weight unexplained by seed number; RESFW: residual berry weight unexplained by total seed fresh weight
