# Supplementary material for: New stable QTLs for berry weight do not colocalize with QTLs for seed traits in cultivated grapevine (Vitis vinifera L.)
Source: PubMed Central journal article supplement (PMC3878267; doi:10.1186/1471-2229-13-217), 2013-12-19

**Additional file 12: Figure S3** - Stable QTLs for seven seed and berry-related traits in the grapevine mapping population MTP3346 (consensus map). The confidence intervals (CIs) shown are for the inter-year BLUPs of the traits for which a QTL overlapping with this CI was also found in at least two different years. Distances are in Kosambi cM. Seed-related traits are in brown. MSN: mean seed number; %SDM: seed dry matter percentage.

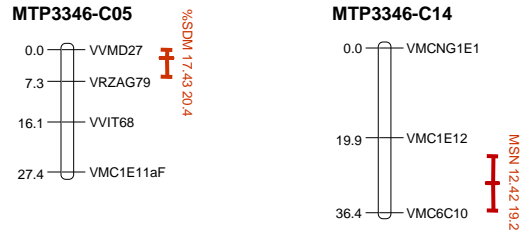

Supplement: 1471-2229-13-217-S12.pdf [file 1471-2229-13-217-S12.pdf]
