# Supplementary material for: New stable QTLs for berry weight do not colocalize with QTLs for seed traits in cultivated grapevine (Vitis vinifera L.)
Source: PubMed Central journal article supplement (PMC3878267; doi:10.1186/1471-2229-13-217), 2013-12-19
Supplement: 1471-2229-13-217-S14.pdf [file 1471-2229-13-217-S14.pdf]

**Additional file 14: Table S10** - Intervals explored and number of positional candidate genes found.

| LG | Trait(s)                 | Population | Left marker <sup>1</sup> | Right marker <sup>1</sup> | Left limit of the interval searched (bp) | Right limit of the interval searched (bp) | Number of genes found <sup>3</sup> |
|----|--------------------------|------------|--------------------------|---------------------------|------------------------------------------|-------------------------------------------|------------------------------------|
| 1  | MSFW                     | SxG        | VMC4F9-2                 | VMC3G9                    | 3,694,116                                | 5,268,843                                 | 127                                |
| 2  | MSN                      | SxG        | VVIB01                   | VVIO55                    | 3,690,461                                | 4,584,558                                 | 87                                 |
| 2  | MSFW                     | SxG        | VVIB01                   | VVIO55                    | 3,392,429                                | 4,286,526                                 | 77                                 |
| 4  | TSFW                     | SxG        | VRZAG83                  | -                         | 19,612,664                               | 20,908,676                                | 124                                |
| 4  | MSN                      | SxG        | VVMD32                   | VRZAG83                   | 19,115,859                               | 20,411,871                                | 120                                |
| 5  | %SDM                     | MTP3346    | VVMD27                   | VVIT68                    | 4,308,971                                | 5,288,353                                 | 81                                 |
| 8  | MBW - RESFW              | SxG        | VMC5G6-1                 | VMC1B11                   | 12,396,132                               | 13,529,508                                | 94                                 |
| 8  | RESN                     | SxG        | VMC1B11                  | VMC3C9                    | 15,353,475                               | 16,479,716                                | 101                                |
| 11 | MBW - RESN               | MTP3140    | VVS2                     | VVIB19                    | 3,758,521                                | 4,667,573                                 | 79                                 |
| 12 | MSFW                     | MTP3140    | VMC8G6                   | VMC2H4                    | 4,789,395                                | 6,105,667                                 | 107                                |
| 13 | RESFW                    | SxG        | VVIH54                   | VMC3D12                   | 3,713,672                                | 5,993,789                                 | 167                                |
| 14 | %SDM                     | MTP3234    | VMC2H12                  | VMC2H5                    | 14,752,927                               | 20,091,576                                | 131                                |
| 14 | MSN                      | MTP3346    | VMC1E12                  | VMC6C10                   | 13,495,265                               | 18,945,265                                | 117                                |
| 17 | MBW                      | MTP3140    | VVIN73                   | VMC9G4                    | 5,132,528                                | 6,850,126                                 | 150                                |
| 17 | RESN                     | MTP3140    | VVIN73                   | VMC9G4                    | 4,645,875                                | 6,363,473                                 | 136                                |
| 17 | MBW - RESN - RESFW       | SxG        | VVIN73                   | VMC9G4                    | 5,256,427                                | 6,745,907                                 | 126                                |
| 18 | MBW - TSFW - %SDM - MSFW | MTP3140    | VVMD17                   | VMC7F2                    | 26,372,842                               | 28,102,527 <sup>2</sup>                   | 100                                |
| 18 | MSN                      | MTP3140    | VVMD17                   | VMC7F2                    | 26,530,086                               | 28,941,162 <sup>2</sup>                   | 147                                |
| 18 | RESN                     | MTP3140    | VVMD17                   | VMC7F2                    | 24,590,742                               | 27,735,624                                | 165                                |
| 18 | MBW - RESN               | SxG        | VVIN83                   | VVIU04                    | 10,416,561                               | 11,910,931                                | 158                                |
| 18 | RESFW                    | SxG        | VVIN83                   | VVIU04                    | 10,914,685                               | 12,409,054                                | 150                                |

<sup>1</sup> Nearest marker present on the 12X genome sequence

<sup>2</sup> Upper limit of the CI lower than LOD peak position + 3 cM

MBW: mean berry weight; MSN: mean seed number; TSFW: total seed fresh weight; MSFW: mean seed fresh weight; %SDM: seed dry matter percentage; RESN: residual berry weight unexplained by seed number; RESFW: residual berry weight unexplained by total seed fresh weight

<sup>3</sup> Genoscope 12X annotation
