# Supplementary material for: New stable QTLs for berry weight do not colocalize with QTLs for seed traits in cultivated grapevine (Vitis vinifera L.)
Source: PubMed Central journal article supplement (PMC3878267; doi:10.1186/1471-2229-13-217), 2013-12-19
Supplement: 1471-2229-13-217-S15.pdf [file 1471-2229-13-217-S15.pdf]

**Additional file 15: Table S11** - Published functional candidate genes potentially involved in seed and/or berry development not colocalized with QTLs detected in the present study. Gene numbers were obtained from the automatic annotation provided with the Genoscope 12X whole genome sequence release of PN40024 (<http://www.genoscope.cns.fr/externe/GenomeBrowser/Vitis/>; [1]).

| Grapevine 12X gene ID | Gene name           | LG | position in 12X      | putative homologous gene and/or function                                                                                 | Reference |
|-----------------------|---------------------|----|----------------------|--------------------------------------------------------------------------------------------------------------------------|-----------|
| GSVIVT01012249001     | <i>VvSEP4</i>       | 1  | 194107 .. 206538     | <i>MIKC</i> gene expressed in flowers and fruit                                                                          | [92]      |
| GSVIVT01012231001     | -                   | 1  | 381267 .. 382921     | Cytochrome P450 78A-like protein in <i>Solanum lycopersicum</i> (tomato), harboring the causal SNP of a berry weight QTL | [56]      |
| GSVIVT01012110001     | <i>VvBS2</i>        | 1  | 1353272 .. 1355920   | <i>MIKC</i> gene expressed in flowers and fruit                                                                          | [92]      |
| GSVIVT01011926001     | -                   | 1  | 2954243..2955469     | ZmCNR2, involved in tissue growth activity in maize                                                                      | [59]      |
| GSVIVG01020033001     | <i>VvHB13</i>       | 1  | 11304894 .. 11307266 | <i>Homeo Box 13 (Arabidopsis)</i> , homeotic protein                                                                     | [89]      |
| GSVIVT01020031001     | <i>VvSUC12</i>      | 1  | 11312668 .. 11322931 | Proton-sucrose symporter (cDNA cloned in <i>V. vinifera</i> and upregulated in berries at <i>véraison</i> )              | [93]      |
| GSVIVG01010521001     | <i>VvMADS4</i>      | 1  | 21368898 .. 21386389 | <i>Agamous like 9 - Sepallata 3 (Arabidopsis)</i> MADS-box flower and berry development                                  | [89, 90]  |
| GSVIVT01010521001     | <i>VvSEP3=MADS4</i> | 1  | 21368898 .. 21386389 | <i>MIKC</i> gene expressed in fruits with increasing expression from flowers to fruits                                   | [90]      |
| GSVIVT01004930001     | <i>VvCEB1</i>       | 1  | 21582290 .. 21584461 | Berry-specific basic helix-loop-helix transcription factor affecting cell size                                           | [94]      |
| GSVIVT01001124001     | <i>VvXET2</i>       | 1  | 22826373 .. 22828816 | Xyloglucan endotransglycosylase (cell-wall modifying enzyme expressed during berry development)                          | [78]      |
| GSVIVT01001124001     | <i>XTH</i>          | 1  | 22826373 .. 22828816 | Xyloglucan:xyloglucosyl transferase involved in ethylene-induced berry expansion                                         | [11]      |
| GSVIVT01019523001     | <i>CEL</i>          | 2  | 1331283 .. 1335833   | Cellulase similar to endo-beta-(1,4)-glucanase with expression linked to berry development                               | [76]      |
| GSVIVT01019653001     | -                   | 2  | 2231724..2233589     | Cytochrome P450, family 78, subfamily A, polypeptide 9 ( <i>Arabidopsis</i> ), controlling fruit size                    | [95]      |

|                   |                        |   |                      |                                                                                                  |          |
|-------------------|------------------------|---|----------------------|--------------------------------------------------------------------------------------------------|----------|
| GSVIVG01019761001 | VvJMJ <sup>1</sup>     | 2 | 3074405 .. 3119122   | <i>F2K11.14</i> , transcription factor jumonji, associated with berry weight and length          | [45, 89] |
| GSVIVT01023919001 | <i>EXPL</i>            | 3 | 2486948 .. 2488738   | Expansin <i>EXPL2</i> with expression linked to berry development                                | [76]     |
| GSVIVG01023852001 | VvHMGR3                | 3 | 2970316 .. 2972915   | <i>HMG1</i> (Arabidopsis), HMGcoA reductase involved in cell elongation and isoprenoid synthesis | [96]     |
| GSVIVG01031753001 | VvFw2.2.2              | 3 | 4060722 .. 4066802   | <i>Fw2.2</i> (tomato), negative regulator of cell division in fruit                              | [58]     |
| GSVIVG01031754001 | VvFw2.2.1              | 3 | 4067224 .. 4070468   | <i>Fw2.2</i> (tomato), negative regulator of cell division in fruit                              | [58]     |
| GSVIVG01031755001 | VvFw2.2.3              | 3 | 4070578 .. 4072718   | <i>Fw2.2</i> (tomato), negative regulator of cell division in fruit                              | [58]     |
| GSVIVG01031941001 | VvBURP1                | 3 | 5579524 .. 5580226   | <i>Unknown seed protein like 1</i> (Arabidopsis), seed development                               | [89]     |
| GSVIVG01031943001 | VvSVP2                 | 3 | 5581839 .. 5591761   | -                                                                                                | [89]     |
| GSVIVT01034945001 | VvGA2ox4               | 5 | 343990 .. 346779     | GA2-oxidase expressed in berry                                                                   | [97]     |
| GSVIVT01027774001 | <i>Grip 3 = Grip 4</i> | 5 | 7580440 .. 7581363   | Proline-rich cell wall protein                                                                   | [98]     |
| GSVIVT01027789001 | <i>Grip 15</i>         | 5 | 7787811 .. 7788943   | Proline-rich cell wall protein                                                                   | [98]     |
| GSVIVT01027790001 | <i>Grip 13</i>         | 5 | 7792153 .. 7793327   | Proline-rich cell wall protein                                                                   | [98]     |
| GSVIVT01029048001 | VvPL1                  | 5 | 11376715 .. 11380856 | Pectate lyase (cell-wall modifying enzyme expressed during berry development)                    | [78]     |
| GSVIVT01031593001 | VvXET1                 | 5 | 18634353 .. 18636084 | Xyloglucan endotransglycosylase (cell-wall modifying enzyme expressed during berry development)  | [78]     |
| GSVIVG01037533001 | VvYABBY2               | 6 | 11951270 .. 11958015 | <i>Fasciated</i> (tomato), controls carpel number                                                | [89]     |
| GSVIVT01031486001 | <i>XET</i>             | 6 | 18028143 .. 18029883 | Xyloglucan:xyloglucosyl transferase with expression linked to berry development                  | [76]     |

|                     |                     |    |                      |                                                                                                                                 |          |
|---------------------|---------------------|----|----------------------|---------------------------------------------------------------------------------------------------------------------------------|----------|
| GSVIVT01031464001   | -                   | 6  | 18257605 .. 18258772 | Major intrinsic family protein involved in ethylene-induced berry expansion                                                     | [11]     |
| GSVIVG01031404001   | Vv <i>HD2C</i>      | 6  | 19041783 .. 19047544 | <i>HD2C</i> , histone deacetylase 2C                                                                                            | [89]     |
| GSVIVT01028281001 ? | -                   | 7  | 5457683 .. 5458417 ? | Integrase (EST expressed only after GA treatment)                                                                               | [99]     |
| GSVIVG01033891001   | Vv <i>SPY</i>       | 8  | 16964462 .. 16984299 | <i>SPINDLY</i> (Arabidopsis), repressor of GA and positive regulation of cytokinin signalling                                   | [100]    |
| GSVIVG01033743001   | Vv <i>RPL24</i>     | 8  | 18192061 .. 18195774 | <i>Ribosomal protein like 24</i> (Arabidopsis), auxin signaling and gynoecium development                                       | [101]    |
| GSVIVT01033540001   | <i>BG</i>           | 8  | 19873175 .. 19874681 | Glycosyl hydrolase family protein, similar to beta-(1,3)-glucanase, with expression linked to berry development                 | [76]     |
| GSVIVT01033303001   | Vv <i>PGI</i>       | 8  | 21672956 .. 21675817 | polygalacturonase (cell-wall modifying enzyme expressed during berry development), involved in ethylene-induced berry expansion | [11, 78] |
| GSVIVT01033253001   | Vv <i>AGL15.2</i>   | 8  | 22162819 .. 22165051 | <i>MIKC</i> gene expressed in flowers and fruit                                                                                 | [92]     |
| GSVIVT01017211001   | Vv <i>GA3ox4</i>    | 9  | 5453528 .. 5458751   | GA3beta-hydrolase gene expressed in berry                                                                                       | [97]     |
| GSVIVT01017353001   | -                   | 9  | 7092507 .. 7134534   | <i>CHY1</i> (EST expressed only after GA treatment)                                                                             | [99]     |
| GSVIVT01021303001   | Vv <i>AG2</i>       | 10 | 3730147 .. 3738385   | <i>MIKC</i> gene expressed in flowers and fruit                                                                                 | [92]     |
| GSVIVT01021445001   | <i>SIRK</i>         | 10 | 5451220 .. 5456608   | K + channel protein (EST expressed only after GA treatment)                                                                     | [99]     |
| GSVIVT01021468001   | Vv <i>GA2ox2</i>    | 10 | 5846741 .. 5848388   | GA2-oxidase expressed in berry                                                                                                  | [97]     |
| GSVIVT01000802001   | Vv <i>AG1=MADS1</i> | 12 | 279315 .. 292144     | <i>MIKC</i> gene expressed in flowers and fruit (Agamous Arabidopsis, MADS box fruit development)                               | [102]    |
| GSVIVT01023135001   | Vv <i>PME1</i>      | 12 | 22226001 .. 22228636 | Pectin methylesterase (cell-wall modifying enzyme expressed during berry development)                                           | [76, 78] |
| GSVIVT01032681001   | Vlexp-2= Vlexp-3    | 13 | 1578645 .. 1580497   | Expansin (cDNA cloned in <i>V. vinifera</i> with expression related to ripening)                                                | [103]    |

|                   |                |    |                      |                                                                                                                       |                            |
|-------------------|----------------|----|----------------------|-----------------------------------------------------------------------------------------------------------------------|----------------------------|
| GSVIVT01001437001 | VvAGL15.1      | 13 | 20980100 .. 20988849 | MIKC gene expressed in flowers and fruit                                                                              | [92]                       |
| GSVIVG01036549001 | VvMADS6        | 14 | 23320331 .. 23341234 | <i>Apetala 1</i> (Arabidopsis), MADS box flower development                                                           | L. Torregrosa (pers. com.) |
| GSVIVT01036551001 | VvSEPI=MADS2   | 14 | 23363222 .. 23379548 | MIKC gene expressed in flowers and fruit                                                                              | [90]                       |
| GSVIVT01032383001 | -              | 14 | 26847692 .. 26853716 | Pseudouridine synthase/transporter (EST expressed only after GA treatment)                                            | [99]                       |
| GSVIVT01011354001 | -              | 14 | 28912919 .. 28915800 | Serine carboxypeptidase-like 44 (EST expressed only after GA treatment)                                               | [99]                       |
| GSVIVT01018185001 | -              | 15 | 13453328..13458913   | PavCNR12, Prunus avium cell number regulator 12 (CNR12) gene, most likely underlying a fruit size QTL in sweet cherry | [55]                       |
| GSVIVT01027577001 | VvAGL6=MADS3   | 15 | 15406740 .. 15424492 | MIKC gene expressed in flowers and fruit (Agl6 and Agl13 Arabidopsis, MADS box seed development)                      | [90]                       |
| GSVIVT01027404001 | -              | 15 | 17005434..17007131   | Cytochrome P450, family 78, subfamily A, polypeptide 9 (Arabidopsis), controlling fruit size                          | [95]                       |
| GSVIVT01026942001 | AQ3=PIP1;2     | 15 | 19199215 .. 19206926 | Plasma membrane intrinsic protein 1A (PIPIA); aquaporin <i>PIPI.1</i> with expression linked to berry development     | [76]                       |
| GSVIVT01024235001 | AQUA           | 16 | 102222 .. 103573     | Aquaporin TIP3-2 (Arabidopsis), major intrinsic family protein, involved in ethylene-induced berry expansion          | [11]                       |
| GSVIVT01018665001 | -              | 16 | 11481264..11488666   | PavCNR12, Prunus avium cell number regulator 12 (CNR12) gene, most likely underlying a fruit size QTL in sweet cherry | [55]                       |
| GSVIVT01018599001 | <i>Grip 28</i> | 16 | 12503456 .. 12517626 | Ripening-related protein, cell wall                                                                                   | [98]                       |
| GSVIVT01018453001 | VvGA20ox1      | 16 | 14861395 .. 14863190 | GA20-oxidase expressed in berry                                                                                       | [97]                       |
| GSVIVT01007582001 | PL             | 17 | 11674724 .. 11676881 | Pectate lyase family protein with expression linked to berry development                                              | [76]                       |
| GSVIVT01012906001 | <i>S27a</i>    | 17 | 13268008 .. 13273528 | Ubiquitin extension protein                                                                                           | [104]                      |

|                   |                     |    |                            |                                                                                                                                |                            |
|-------------------|---------------------|----|----------------------------|--------------------------------------------------------------------------------------------------------------------------------|----------------------------|
| GSVIVT01029411001 | <i>EX = Vlexp-1</i> | 17 | 16771613 .. 16773967       | Expansin with expression related to ripening, involved in ethylene-induced berry expansion                                     | [11, 103]                  |
| GSVIVT01013458001 | -                   | 18 | 307575 .. 308424           | Uncharacterized, significantly associated with berry size                                                                      | [44]                       |
| GSVIVG01013435001 | <i>VvHMGR1</i>      | 18 | 494023 .. 498427           | <i>HMG1</i> (Arabidopsis), HMGcoA reductase involved in cell elongation and isoprenoid synthesis, associated with berry length | [45, 96]                   |
| GSVIVT01013402001 | -                   | 18 | 686115 .. 690591           | Endoribonuclease/protein kinase Ire1p-like (Arabidopsis), significantly associated with berry size                             | [44]                       |
| GSVIVT01013367001 | -                   | 18 | 927341 .. 932130           | Catalase, significantly associated with berry size                                                                             | [44]                       |
| GSVIVT01013363001 | -                   | 18 | 949015 .. 961356           | Ribosome biogenesis, significantly associated with berry size                                                                  | [44]                       |
| GSVIVT01008762001 | <i>EXPI</i>         | 18 | 1778795 .. 1780353         | Expansin <i>EXPI1</i> with expression linked to berry development                                                              | [76]                       |
| GSVIVT01008762001 | <i>AQI</i>          | 18 | 1778795 .. 1780353         | Major intrinsic family protein MIP with expression linked to berry development                                                 | [76]                       |
| GSVIVG01008806001 | <i>VvMADS9</i>      | 18 | 2291789 .. 2294142         | <i>Pistilata</i> (Arabidopsis), MADS box flower development                                                                    | [89]                       |
| GSVIVT01009024001 | <i>VvHT2</i>        | 18 | 4363667 .. 4369067         | Hexose transporter (cDNA cloned in <i>V. vinifera</i> with increased expression around <i>véraison</i> )                       | [105]                      |
| GSVIVG01009171001 | <i>VvAGL22.2</i>    | 18 | 5694493 .. 5711399         | <i>Agamous like 22</i> (Arabidopsis), MADS box flower development                                                              | L. Torregrosa (pers. com.) |
| GSVIVT01009219001 | <i>VvAGL17.1</i>    | 18 | 6350901 .. 6376307         | <i>Agamous like 17</i> (Arabidopsis), MADS box                                                                                 | [92]                       |
| GSVIVT01009254001 | <i>VvSUC11</i>      | 18 | 6693573 .. 6703325         | Proton-sucrose symporter (cDNA cloned in <i>V. vinifera</i> and upregulated in berries at <i>véraison</i> )                    | [93]                       |
| -                 | <i>VvKO</i>         | 18 | 9625800 .. 9625486 (blast) | Ent-Kaurene oxidase expressed in berry                                                                                         | [97]                       |
| GSVIVT01005051001 | <i>VvCBPI</i>       | Un | 17696019 .. 17698346       | Calcium-binding protein involved in embryo                                                                                     | [106]                      |

|                   |                |    |                      |                                                                                |      |
|-------------------|----------------|----|----------------------|--------------------------------------------------------------------------------|------|
|                   |                |    |                      | development                                                                    |      |
| - (AJ237987)      | <i>Grip 68</i> | Un | 94441 .. 154135      | Ripening-related protein, cell wall                                            | [98] |
| GSVIVT01007333001 | <i>CS</i>      | Un | 31413744 .. 31415587 | Cellulose synthase family protein involved in ethylene-induced berry expansion | [11] |

<sup>1</sup> Not a berry or seed QTL because sex QTL
